# Supplementary material for: Copper-catalyzed diastereoselective hydrothioetherification of oxa(aza)benzonorbornadienes
Source: Royal Society of Chemistry journal article supplement (doi:10.1039/d0ob00659a), 2020-01-01

## Supporting Information

### Copper-Catalyzed Diastereoselective Hydrothioetherification of Oxa(aza)benzonorbornadienes

Qifu Lin<sup>a,b</sup>, Yongqi Yao<sup>a</sup>, Wen Yang<sup>a</sup>, Yun Tan<sup>a</sup>, Shuqi Chen<sup>a</sup>, Donghan Chen<sup>a</sup> and Dingqiao Yang<sup>\*a</sup>

<sup>a</sup>Key Laboratory of Theoretical Chemistry of Environment, Ministry of Education, School of Chemistry, South China Normal University, Guangzhou 510006, People's Republic of China

<sup>b</sup>College of Marine Sciences, Beibu Gulf University, Qinzhou 535011, People's Republic of China

E-mail: yangdq@scnu.edu.cn

### Contents

|                                                                                                             |     |
|-------------------------------------------------------------------------------------------------------------|-----|
| 1. Deuterium-labeling experiments.....                                                                      | S2  |
| 2. NOESY analysis of <b>3db</b> .....                                                                       | S6  |
| 3. Crystal data and structure refinement for <b>3cb</b> .....                                               | S7  |
| 4. Copies of <sup>1</sup> H, <sup>13</sup> C, and <sup>19</sup> F NMR spectra for products <b>3-6</b> ..... | S12 |

## 1. Deuterium-labeling experiments<sup>[a][b]</sup>

<sup>[a]</sup> **(a)** The H of the CH<sub>2</sub> could be seen in the <sup>1</sup>H NMR spectrum of adduct **3aa**. **(b)** No deuterium incorporation in the desired product was noted when using deuterated DMF as the solvent. **(c)** When using 0.2 mL D<sub>2</sub>O and 2 mL DMF as the mixed solvent, partially labeled product with 49% deuterium was obtained. **(d)** When increasing the amount of D<sub>2</sub>O to 0.4 mL, the deuteration ratio of the product was increased to 68%. The above results indicate that the water in the DMF or air should be the hydrogen source for this hydrothiolation reaction.

<sup>[b]</sup> **(e)** The *exo*-H and *endo*-H of the CH<sub>2</sub> could be seen in the <sup>1</sup>H NMR spectrum of adduct **3db**. **(f)** When using 0.2 mL D<sub>2</sub>O and 2 mL DMF as the mixed solvent, partial *exo*-H of the desired product was deuterated (63% D). This result means that the hydrogen atom is introduced into the *exo* orientation of the corresponding adduct.

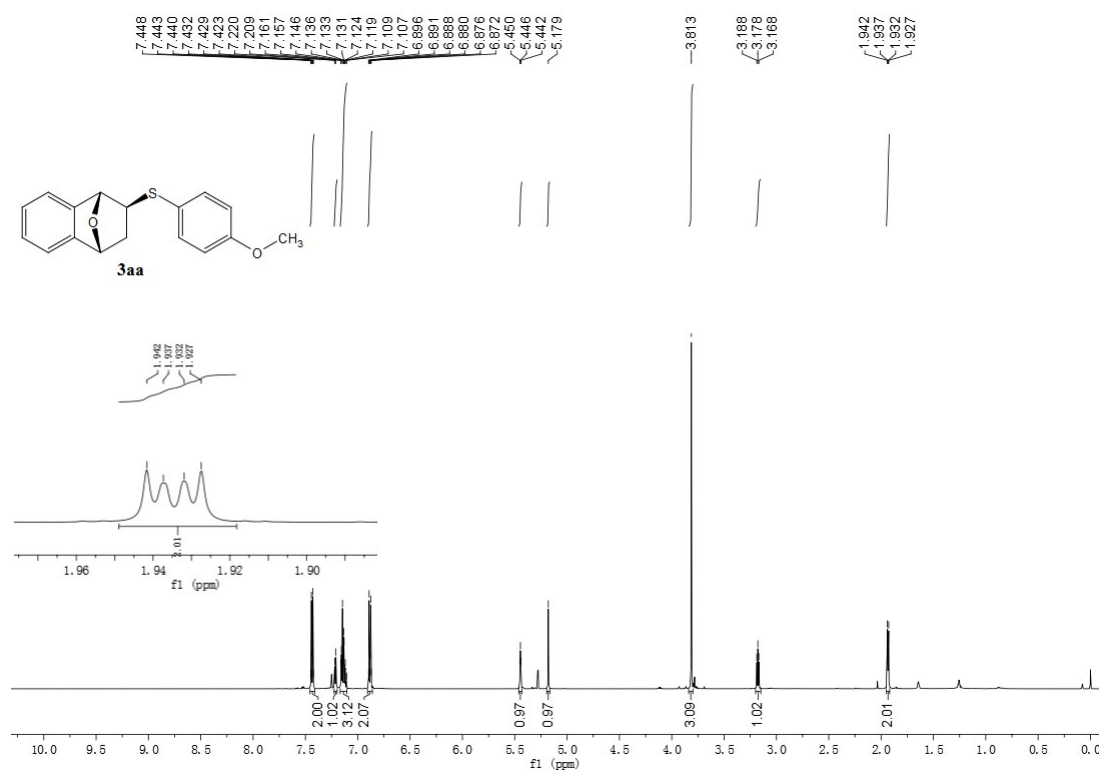

**(a)**

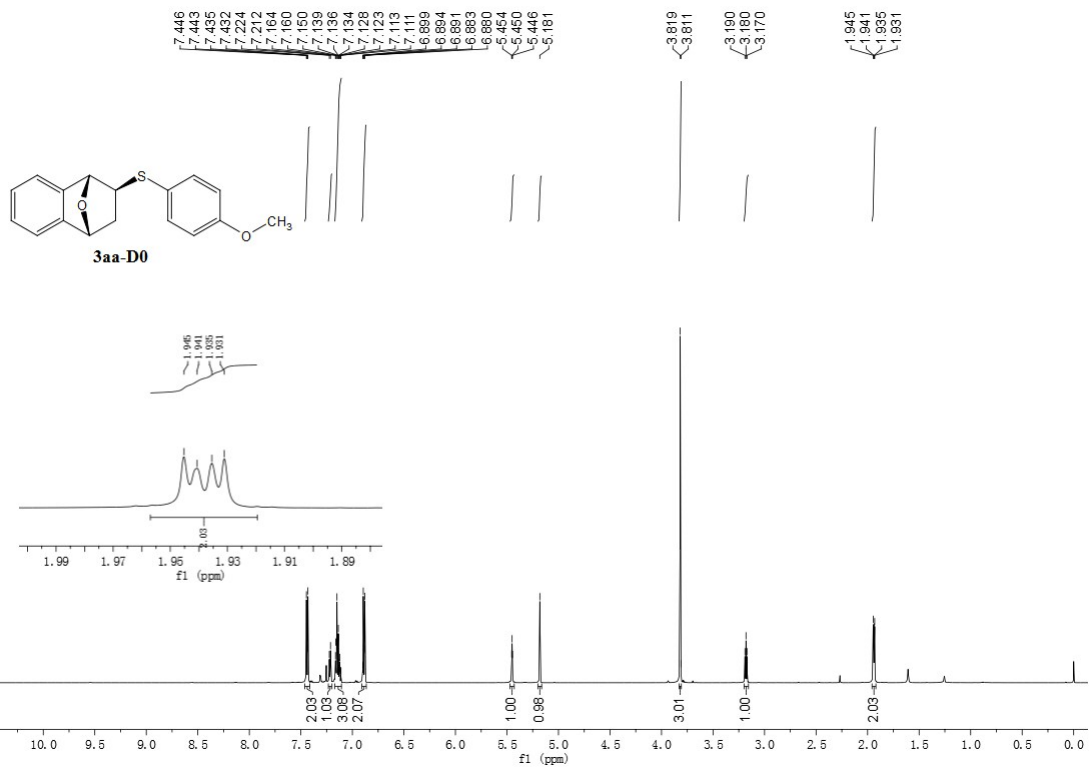

(b)

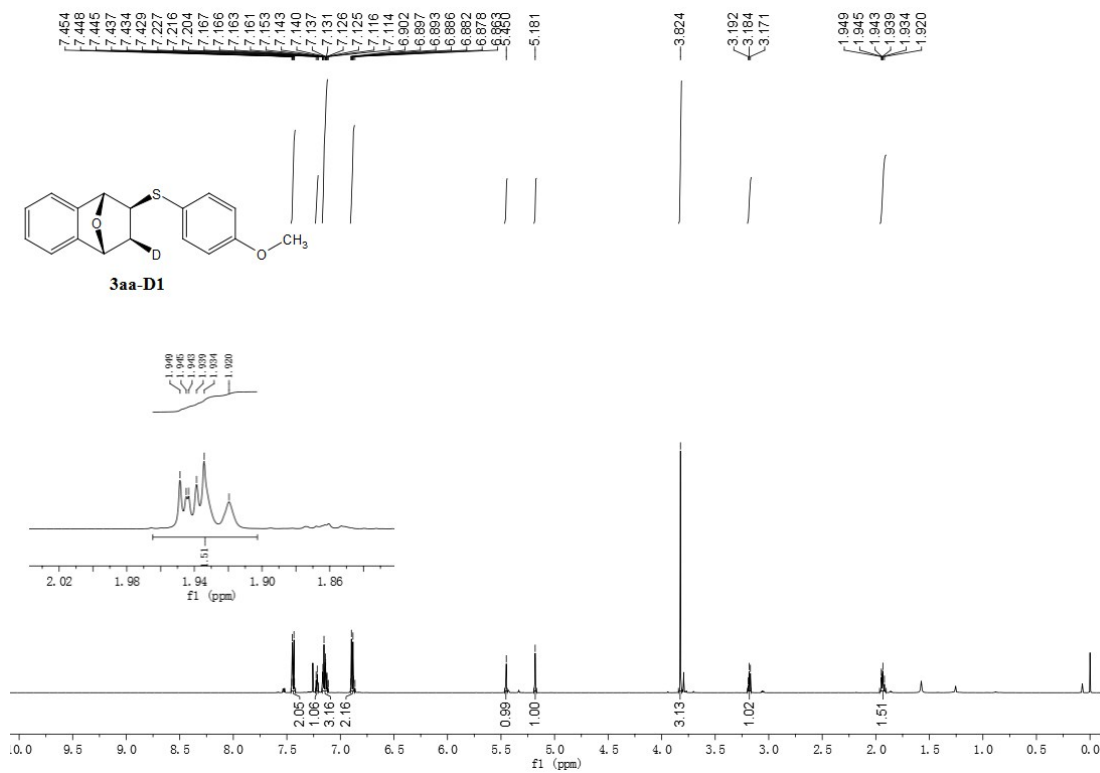

(c)

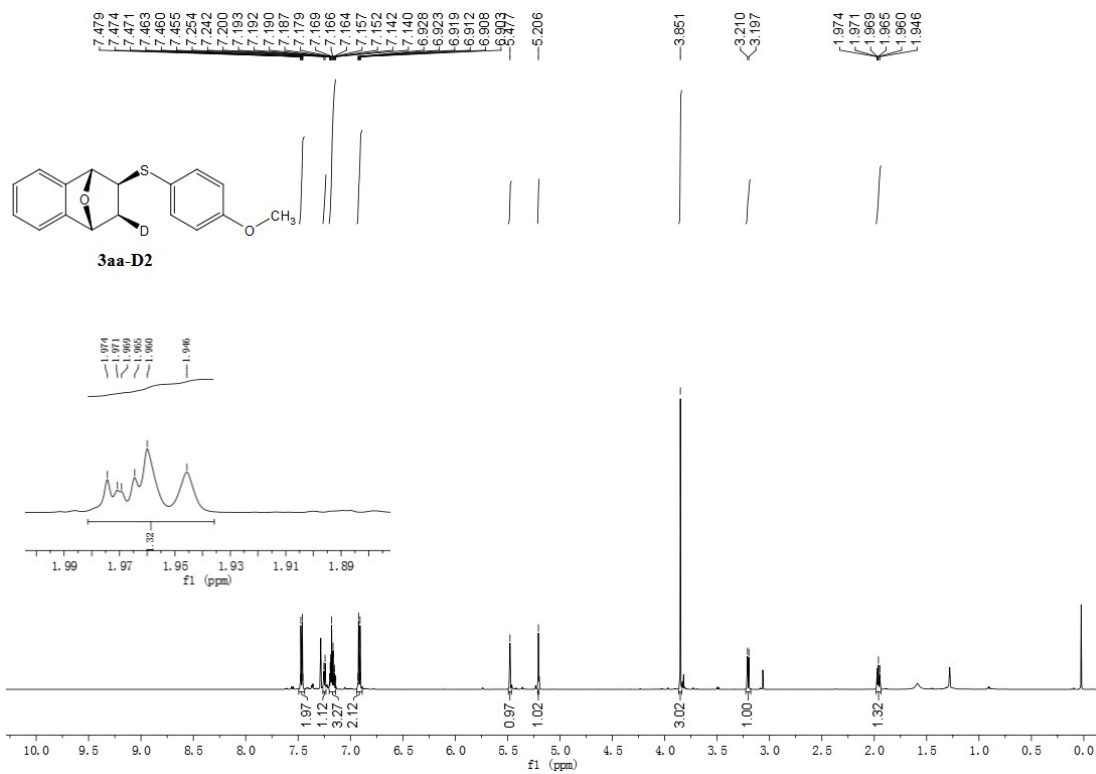

(d)

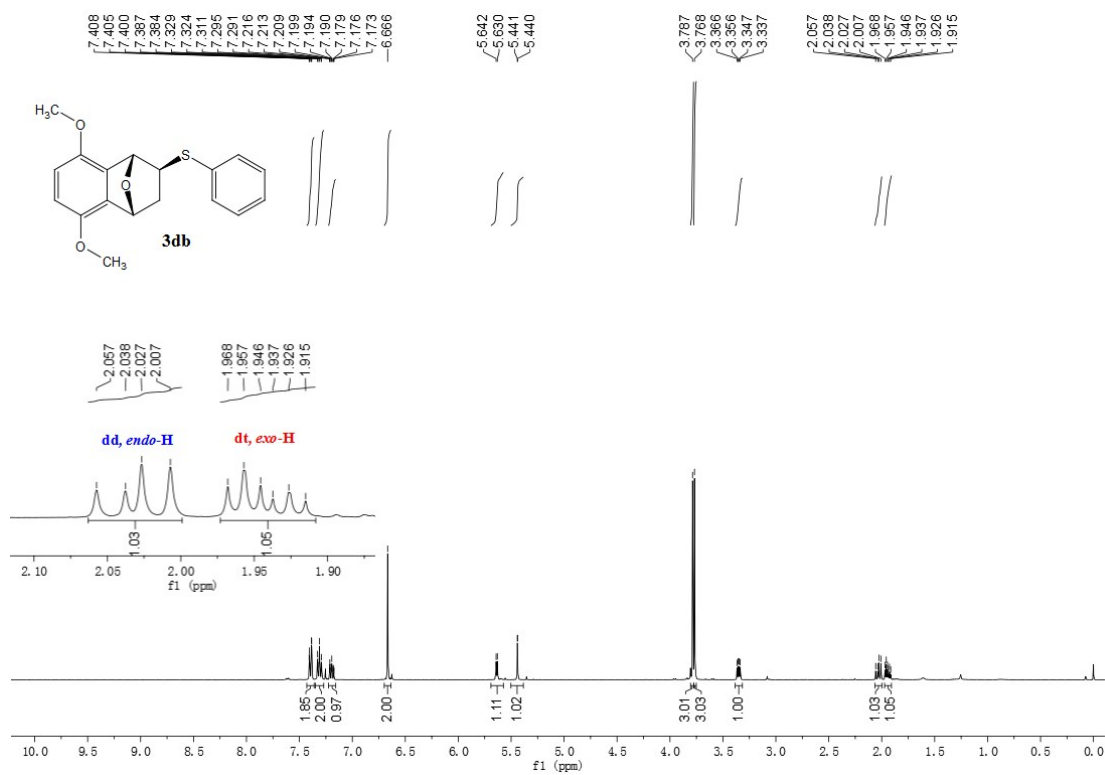

(e)



## 2. NOESY analysis of 3db.

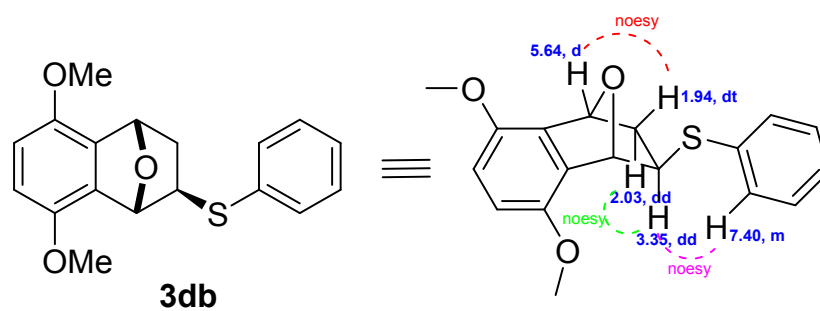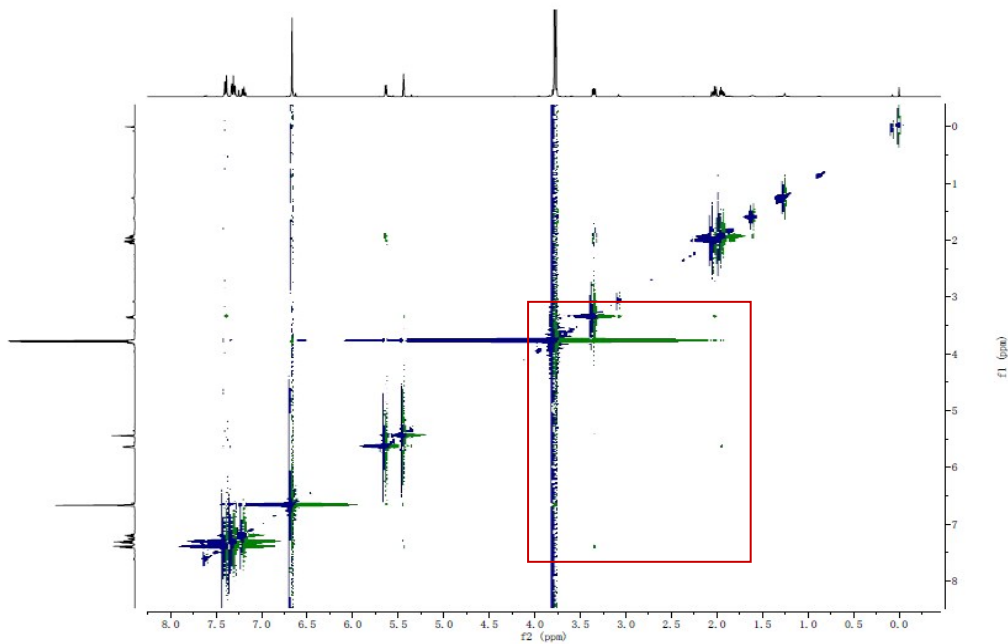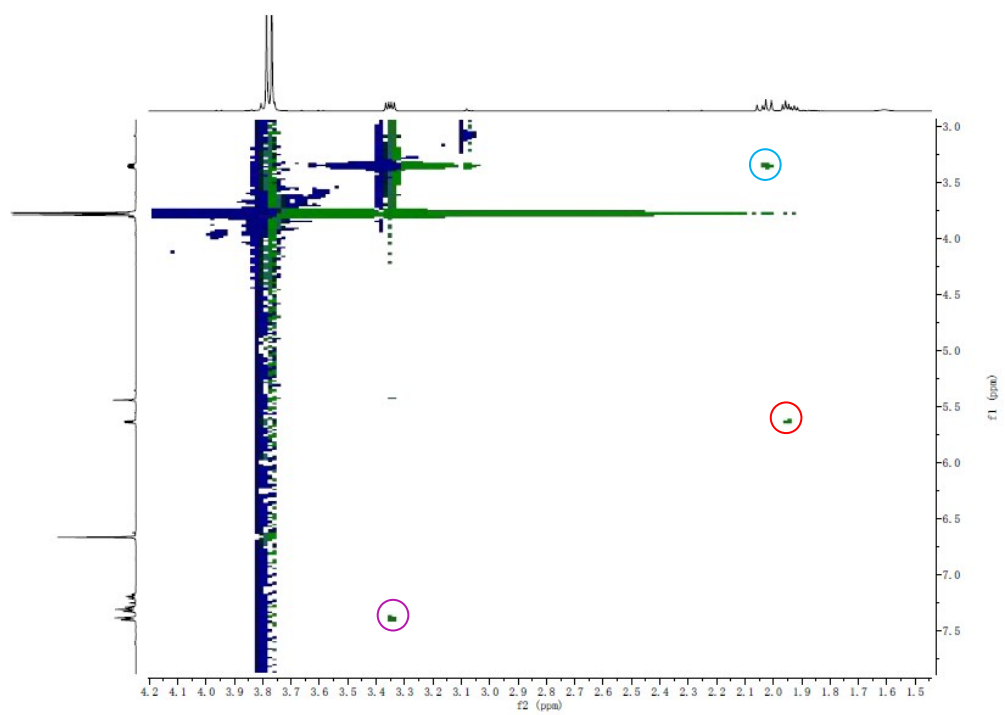

### 3. Crystal data and structure refinement for **3cb** (CCDC 1970314)

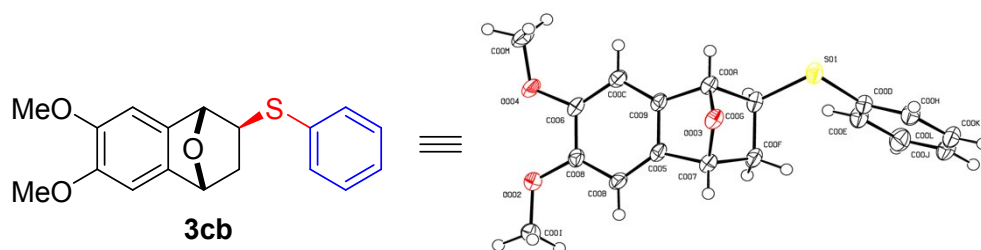

**Table 1** Crystal data and structure refinement for **3cb**.

|                                             |                                                               |
|---------------------------------------------|---------------------------------------------------------------|
| Identification code                         | wang_20191205                                                 |
| Empirical formula                           | C <sub>18</sub> H <sub>18</sub> O <sub>3</sub> S              |
| Formula weight                              | 314.38                                                        |
| Temperature/K                               | 150.00(10)                                                    |
| Crystal system                              | monoclinic                                                    |
| Space group                                 | P2 <sub>1</sub> /n                                            |
| a/Å                                         | 5.54660(10)                                                   |
| b/Å                                         | 9.9811(2)                                                     |
| c/Å                                         | 27.5422(5)                                                    |
| α/°                                         | 90                                                            |
| β/°                                         | 91.085(2)                                                     |
| γ/°                                         | 90                                                            |
| Volume/Å <sup>3</sup>                       | 1524.50(5)                                                    |
| Z                                           | 4                                                             |
| ρ <sub>calc</sub> /g/cm <sup>3</sup>        | 1.370                                                         |
| μ/mm <sup>-1</sup>                          | 1.971                                                         |
| F(000)                                      | 664.0                                                         |
| Crystal size/mm <sup>3</sup>                | 0.15 × 0.14 × 0.02                                            |
| Radiation                                   | Cu Kα (λ = 1.54184)                                           |
| 2θ range for data collection/°              | 6.42 to 134.958                                               |
| Index ranges                                | -5 ≤ h ≤ 6, -11 ≤ k ≤ 11, -32 ≤ l ≤ 33                        |
| Reflections collected                       | 6733                                                          |
| Independent reflections                     | 2749 [R <sub>int</sub> = 0.0382, R <sub>sigma</sub> = 0.0475] |
| Data/restraints/parameters                  | 2749/0/201                                                    |
| Goodness-of-fit on F <sup>2</sup>           | 1.069                                                         |
| Final R indexes [I ≥ 2σ (I)]                | R <sub>1</sub> = 0.0404, wR <sub>2</sub> = 0.1143             |
| Final R indexes [all data]                  | R <sub>1</sub> = 0.0441, wR <sub>2</sub> = 0.1178             |
| Largest diff. peak/hole / e Å <sup>-3</sup> | 0.27/-0.40                                                    |

**Table 2** Fractional Atomic Coordinates ( $\times 10^4$ ) and Equivalent Isotropic Displacement Parameters ( $\text{\AA}^2 \times 10^3$ ) for **3cb**.  $U_{\text{eq}}$  is defined as 1/3 of of the trace of the orthogonalised  $U_{\text{ij}}$  tensor.

| Atom | x          | y          | z         | $U_{\text{eq}}$ |
|------|------------|------------|-----------|-----------------|
| S01  | 11219.4(8) | 1773.0(5)  | 5290.2(2) | 28.31(17)       |
| O002 | 3394(2)    | 3795.4(13) | 2936.5(4) | 29.4(3)         |
| O003 | 10535(2)   | 4128.9(12) | 4518.1(4) | 25.8(3)         |
| O004 | 6528(2)    | 2010.0(13) | 2707.4(4) | 30.7(3)         |
| C005 | 7133(3)    | 3828.0(17) | 4047.0(6) | 23.2(4)         |
| C006 | 6785(3)    | 2522.0(17) | 3168.9(6) | 23.9(4)         |
| C007 | 7937(3)    | 4324.0(18) | 4543.5(6) | 25.5(4)         |
| C008 | 5092(3)    | 3517.9(17) | 3289.0(6) | 23.3(4)         |
| C009 | 8746(3)    | 2810.5(17) | 3936.3(6) | 22.4(4)         |
| C00A | 10447(3)   | 2740.9(18) | 4371.0(6) | 23.9(4)         |
| C00B | 5258(3)    | 4175.7(17) | 3735.1(6) | 24.5(4)         |
| C00C | 8586(3)    | 2134.2(18) | 3497.0(6) | 24.2(4)         |
| C00D | 9356(3)    | 1397.9(19) | 5788.0(6) | 27.4(4)         |
| C00E | 7269(3)    | 633(2)     | 5736.4(7) | 31.5(4)         |
| C00F | 7250(3)    | 3248.7(18) | 4920.6(6) | 26.3(4)         |
| C00G | 9043(3)    | 2107.8(19) | 4799.7(6) | 25.4(4)         |
| C00H | 10077(4)   | 1850(2)    | 6248.4(7) | 33.6(4)         |
| C00I | 1747(4)    | 4856(2)    | 3034.7(7) | 32.9(4)         |
| C00J | 5930(4)    | 324(2)     | 6140.5(8) | 38.8(5)         |
| C00K | 8722(4)    | 1517(2)    | 6652.7(7) | 39.2(5)         |
| C00L | 6657(4)    | 760(2)     | 6596.3(7) | 40.3(5)         |
| C00M | 8543(4)    | 1302(2)    | 2524.1(7) | 39.7(5)         |

**Table 3** Anisotropic Displacement Parameters ( $\text{\AA}^2 \times 10^3$ ) for **3cb**. The Anisotropic displacement factor exponent takes the form:  $-2\pi^2[h^2a^2U_{11}+2hka*b*U_{12}+\dots]$ .

| Atom | $U_{11}$ | $U_{22}$ | $U_{33}$ | $U_{23}$ | $U_{13}$ | $U_{12}$  |
|------|----------|----------|----------|----------|----------|-----------|
| S01  | 28.6(3)  | 36.8(3)  | 19.6(3)  | 3.79(17) | 2.25(18) | -3.09(17) |
| O002 | 29.6(7)  | 37.6(7)  | 21.2(6)  | 0.9(5)   | 1.8(5)   | 6.6(5)    |
| O003 | 28.3(6)  | 28.0(6)  | 21.2(6)  | -2.0(5)  | 4.6(5)   | -5.5(5)   |
| O004 | 33.4(7)  | 40.2(7)  | 18.7(6)  | -9.3(5)  | 1.7(5)   | 6.4(6)    |
| C005 | 29.1(9)  | 24.2(8)  | 16.5(8)  | 0.1(6)   | 6.6(7)   | -2.5(7)   |
| C006 | 28.2(9)  | 27.0(9)  | 16.6(8)  | -2.6(7)  | 6.0(7)   | -3.1(7)   |
| C007 | 29.4(9)  | 28.0(9)  | 19.3(9)  | -3.0(7)  | 4.1(7)   | -0.6(7)   |
| C008 | 25.9(8)  | 26.7(9)  | 17.5(8)  | 3.4(7)   | 4.0(6)   | -1.4(7)   |
| C009 | 26.3(9)  | 24.2(8)  | 16.9(8)  | 1.2(7)   | 5.5(7)   | -1.5(7)   |



|      |          |          |          |          |         |          |
|------|----------|----------|----------|----------|---------|----------|
| C00A | 25.8(8)  | 26.8(9)  | 19.2(8)  | -0.4(7)  | 4.8(7)  | -2.3(7)  |
| C00B | 28.9(9)  | 24.5(9)  | 20.5(9)  | 0.6(7)   | 8.6(7)  | 2.6(7)   |
| C00C | 28.9(9)  | 23.1(8)  | 20.8(9)  | -1.1(7)  | 6.0(7)  | 0.5(7)   |
| C00D | 32.8(9)  | 29.8(9)  | 19.5(9)  | 1.7(7)   | 2.0(7)  | 3.9(7)   |
| C00E | 34.9(10) | 37.3(10) | 22.5(9)  | 2.2(8)   | 3.0(7)  | -1.8(8)  |
| C00F | 27.0(9)  | 35.4(10) | 16.7(8)  | -0.8(7)  | 4.8(7)  | -1.6(7)  |
| C00G | 29.8(9)  | 29.9(9)  | 16.7(8)  | 0.9(7)   | 2.2(7)  | -4.7(7)  |
| C00H | 42.6(11) | 34.9(10) | 23.3(9)  | -1.3(8)  | 0.0(8)  | 3.7(8)   |
| C00I | 31.4(10) | 40.1(11) | 27.3(10) | 7.0(8)   | 5.2(8)  | 8.7(8)   |
| C00J | 37.1(11) | 48.3(12) | 31.4(10) | 9.3(9)   | 10.0(9) | -0.7(9)  |
| C00K | 57.4(13) | 40.9(11) | 19.4(9)  | -0.2(8)  | 5.1(9)  | 12.3(10) |
| C00L | 47.7(12) | 49.0(12) | 24.8(10) | 9.1(9)   | 14.7(9) | 10.1(10) |
| C00M | 36.6(11) | 56.3(13) | 26.4(10) | -16.3(9) | 4.2(8)  | 7.9(10)  |

**Table 4** Bond Lengths for **3cb**.

| Atom | Atom | Length/Å   | Atom | Atom | Length/Å |
|------|------|------------|------|------|----------|
| S01  | C00D | 1.7724(18) | C007 | C00F | 1.546(2) |
| S01  | C00G | 1.8255(18) | C008 | C00B | 1.394(2) |
| O002 | C008 | 1.368(2)   | C009 | C00A | 1.512(2) |
| O002 | C00I | 1.428(2)   | C009 | C00C | 1.387(2) |
| O003 | C007 | 1.457(2)   | C00A | C00G | 1.560(2) |
| O003 | C00A | 1.444(2)   | C00D | C00E | 1.392(3) |
| O004 | C006 | 1.375(2)   | C00D | C00H | 1.397(3) |
| O004 | C00M | 1.423(2)   | C00E | C00J | 1.384(3) |
| C005 | C007 | 1.514(2)   | C00F | C00G | 1.552(3) |
| C005 | C009 | 1.391(2)   | C00H | C00K | 1.396(3) |
| C005 | C00B | 1.381(3)   | C00J | C00L | 1.382(3) |
| C006 | C008 | 1.411(2)   | C00K | C00L | 1.378(3) |
| C006 | C00C | 1.389(3)   |      |      |          |

**Table 5** Bond Angles for **3cb**.

| Atom | Atom | Atom | Angle/°    | Atom | Atom | Atom | Angle/°    |
|------|------|------|------------|------|------|------|------------|
| C00D | S01  | C00G | 102.95(8)  | C00C | C009 | C00A | 134.21(16) |
| C008 | O002 | C00I | 116.75(14) | O003 | C00A | C009 | 101.26(14) |
| C00A | O003 | C007 | 96.53(12)  | O003 | C00A | C00G | 101.01(13) |

|      |      |      |            |      |      |      |            |
|------|------|------|------------|------|------|------|------------|
| C006 | O004 | C00M | 116.35(14) | C009 | C00A | C00G | 107.75(14) |
| C009 | C005 | C007 | 104.90(15) | C005 | C00B | C008 | 117.78(16) |
| C00B | C005 | C007 | 133.27(16) | C009 | C00C | C006 | 117.73(16) |
| C00B | C005 | C009 | 121.82(16) | C00E | C00D | S01  | 122.22(14) |
| O004 | C006 | C008 | 114.88(15) | C00E | C00D | C00H | 119.54(18) |
| O004 | C006 | C00C | 123.95(15) | C00H | C00D | S01  | 118.20(15) |
| C00C | C006 | C008 | 121.15(16) | C00J | C00E | C00D | 119.89(19) |
| O003 | C007 | C005 | 100.80(13) | C007 | C00F | C00G | 101.43(13) |
| O003 | C007 | C00F | 101.30(14) | C00A | C00G | S01  | 107.55(12) |
| C005 | C007 | C00F | 107.93(14) | C00F | C00G | S01  | 113.13(12) |
| O002 | C008 | C006 | 115.37(15) | C00F | C00G | C00A | 101.32(14) |
| O002 | C008 | C00B | 124.25(16) | C00K | C00H | C00D | 119.9(2)   |
| C00B | C008 | C006 | 120.35(16) | C00L | C00J | C00E | 120.5(2)   |
| C005 | C009 | C00A | 104.73(14) | C00L | C00K | C00H | 120.0(2)   |
| C00C | C009 | C005 | 121.03(16) | C00K | C00L | C00J | 120.19(18) |

**Table 6** Torsion Angles for **3cb**.

| A    | B    | C    | D    | Angle/°     | A    | B    | C    | D    | Angle/°     |
|------|------|------|------|-------------|------|------|------|------|-------------|
| S01  | C00D | C00E | C00J | 177.38(16)  | C009 | C00A | C00G | C00F | -70.20(17)  |
| S01  | C00D | C00H | C00K | -176.76(15) | C00A | O003 | C007 | C005 | -52.34(14)  |
| O002 | C008 | C00B | C005 | -177.23(15) | C00A | O003 | C007 | C00F | 58.62(14)   |
| O003 | C007 | C00F | C00G | -35.20(16)  | C00A | C009 | C00C | C006 | -177.20(17) |
| O003 | C00A | C00G | S01  | -83.39(14)  | C00B | C005 | C007 | O003 | -148.41(18) |
| O003 | C00A | C00G | C00F | 35.53(16)   | C00B | C005 | C007 | C00F | 105.8(2)    |
| O004 | C006 | C008 | O002 | 2.2(2)      | C00B | C005 | C009 | C00A | -178.91(15) |
| O004 | C006 | C008 | C00B | -175.91(15) | C00B | C005 | C009 | C00C | 2.4(3)      |
| O004 | C006 | C00C | C009 | 174.98(16)  | C00C | C006 | C008 | O002 | -179.20(15) |
| C005 | C007 | C00F | C00G | 70.19(17)   | C00C | C006 | C008 | C00B | 2.7(3)      |
| C005 | C009 | C00A | O003 | -33.25(16)  | C00C | C009 | C00A | O003 | 145.13(19)  |
| C005 | C009 | C00A | C00G | 72.30(17)   | C00C | C009 | C00A | C00G | -109.3(2)   |
| C005 | C009 | C00C | C006 | 1.0(3)      | C00D | S01  | C00G | C00A | 168.32(12)  |
| C006 | C008 | C00B | C005 | 0.7(2)      | C00D | S01  | C00G | C00F | 57.28(14)   |
| C007 | O003 | C00A | C009 | 52.51(13)   | C00D | C00E | C00J | C00L | -0.5(3)     |
| C007 | O003 | C00A | C00G | -58.31(14)  | C00D | C00H | C00K | C00L | -1.0(3)     |
| C007 | C005 | C009 | C00A | -0.03(17)   | C00E | C00D | C00H | C00K | 0.9(3)      |
| C007 | C005 | C009 | C00C | -178.68(15) | C00E | C00J | C00L | C00K | 0.4(3)      |
| C007 | C005 | C00B | C008 | 178.25(17)  | C00G | S01  | C00D | C00E | 39.98(18)   |
| C007 | C00F | C00G | S01  | 114.83(13)  | C00G | S01  | C00D | C00H | -142.39(15) |
| C007 | C00F | C00G | C00A | 0.00(17)    | C00H | C00D | C00E | C00J | -0.2(3)     |

|      |      |      |      |            |      |      |      |      |             |
|------|------|------|------|------------|------|------|------|------|-------------|
| C008 | C006 | C00C | C009 | -3.5(2)    | C00H | C00K | C00L | C00J | 0.3(3)      |
| C009 | C005 | C007 | O003 | 32.90(16)  | C00I | O002 | C008 | C006 | -176.24(15) |
| C009 | C005 | C007 | C00F | -72.85(17) | C00I | O002 | C008 | C00B | 1.8(2)      |
| C009 | C005 | C00B | C008 | -3.2(2)    | C00M | O004 | C006 | C008 | 162.89(17)  |
| C009 | C00A | C00G | S01  | 170.88(12) | C00M | O004 | C006 | C00C | -15.7(2)    |

**Table 7** Hydrogen Atom Coordinates ( $\text{\AA}\times 10^4$ ) and Isotropic Displacement Parameters ( $\text{\AA}^2\times 10^3$ ) for **3cb**.

| Atom | <i>x</i> | <i>y</i> | <i>z</i> | U(eq) |
|------|----------|----------|----------|-------|
| H007 | 7430     | 5238     | 4622     | 31    |
| H00A | 12018    | 2333     | 4308     | 29    |
| H00B | 4142     | 4827     | 3820     | 29    |
| H00C | 9648     | 1445     | 3424     | 29    |
| H00E | 6774     | 331      | 5431     | 38    |
| H00D | 5590     | 2961     | 4876     | 32    |
| H00F | 7493     | 3572     | 5250     | 32    |
| H00G | 8194     | 1290     | 4698     | 30    |
| H00H | 11457    | 2373     | 6285     | 40    |
| H00I | 661      | 4969     | 2762     | 49    |
| H00J | 2627     | 5672     | 3090     | 49    |
| H00K | 845      | 4640     | 3318     | 49    |
| H00L | 4529     | -181     | 6105     | 47    |
| H00M | 9211     | 1806     | 6960     | 47    |
| H00N | 5752     | 542      | 6866     | 48    |
| H00O | 8313     | 1154     | 2182     | 60    |
| H00P | 8694     | 455      | 2687     | 60    |
| H00Q | 9982     | 1818     | 2580     | 60    |

4. Copies of  $^1\text{H}$ ,  $^{13}\text{C}$ , and  $^{19}\text{F}$  NMR spectra for products 3-6.

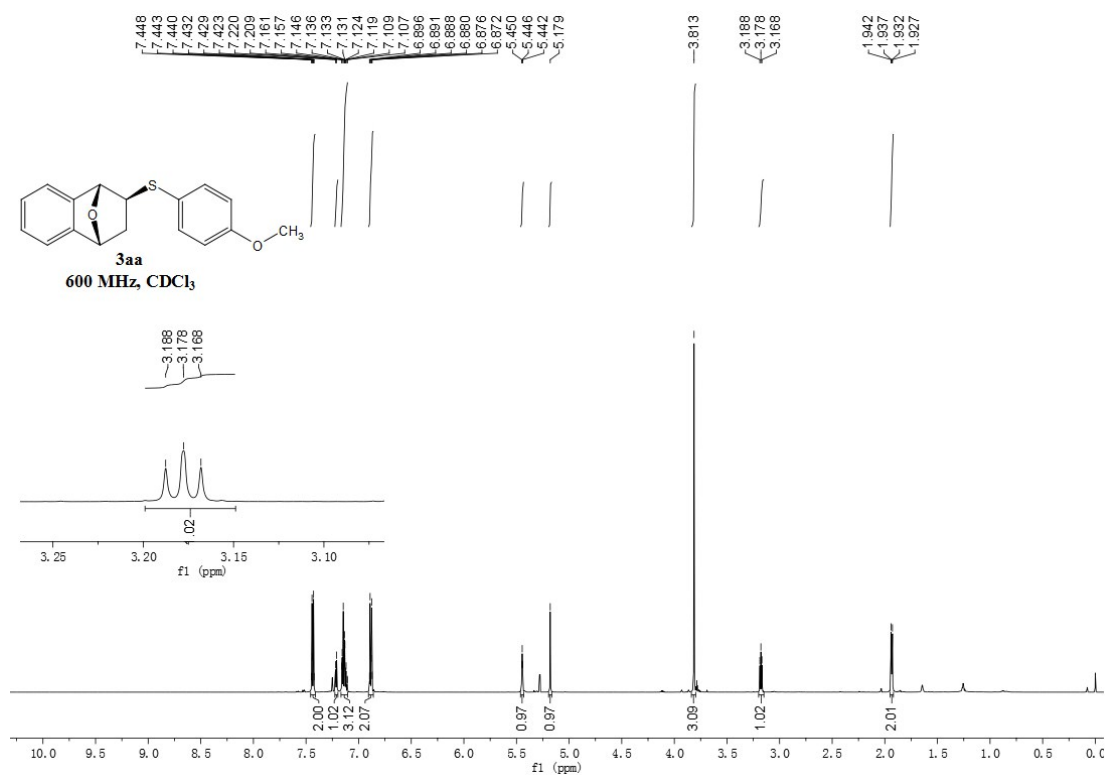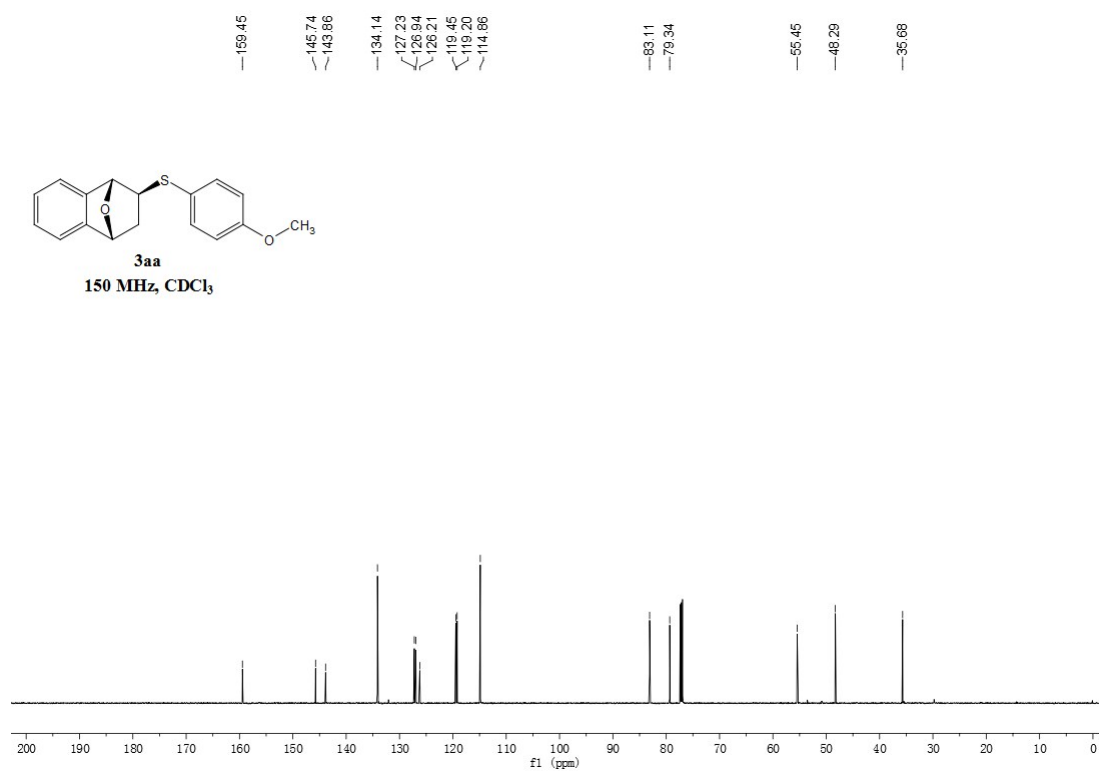

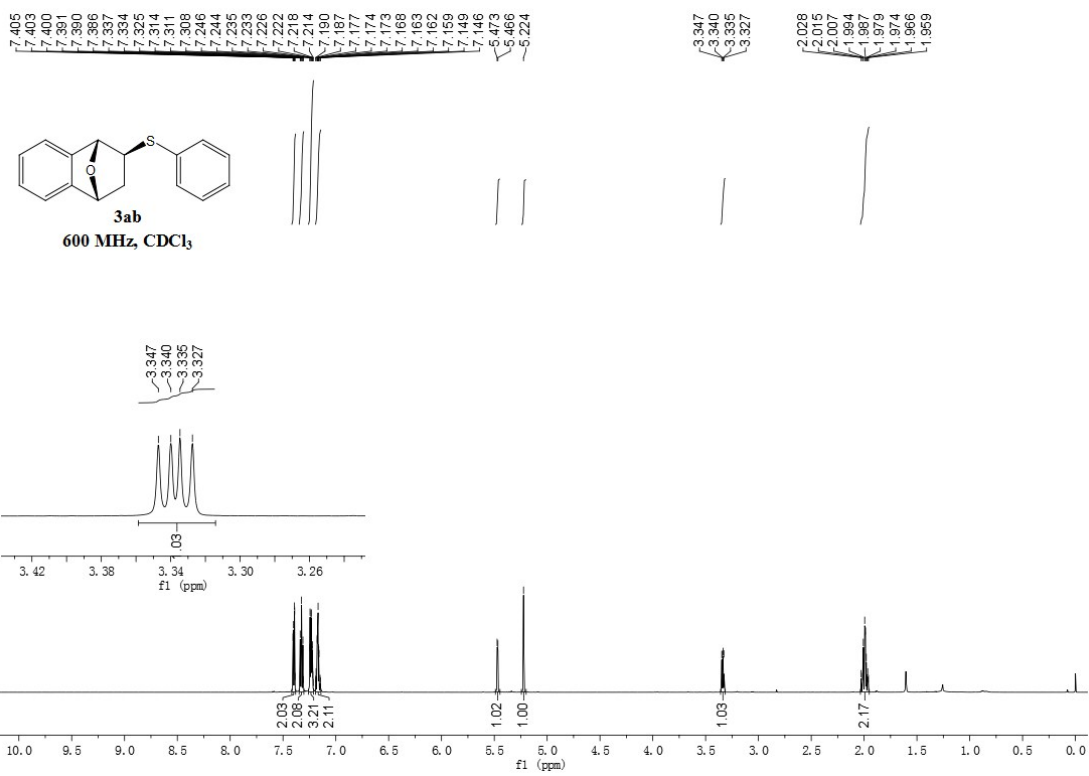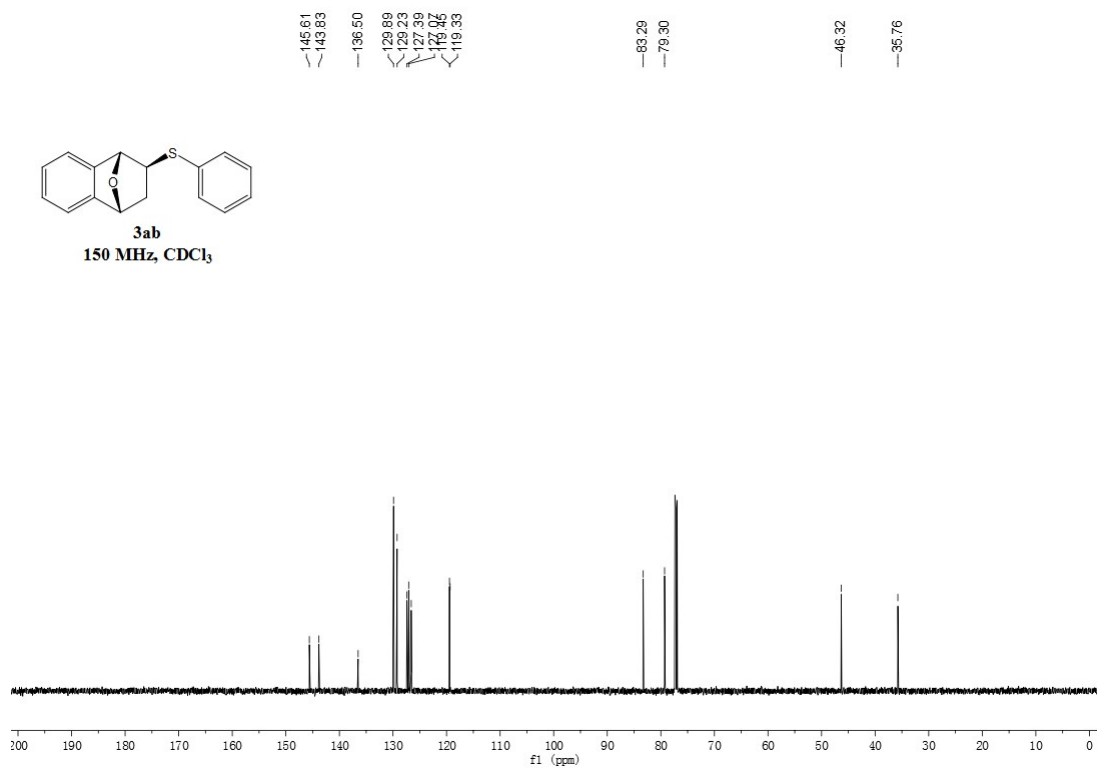

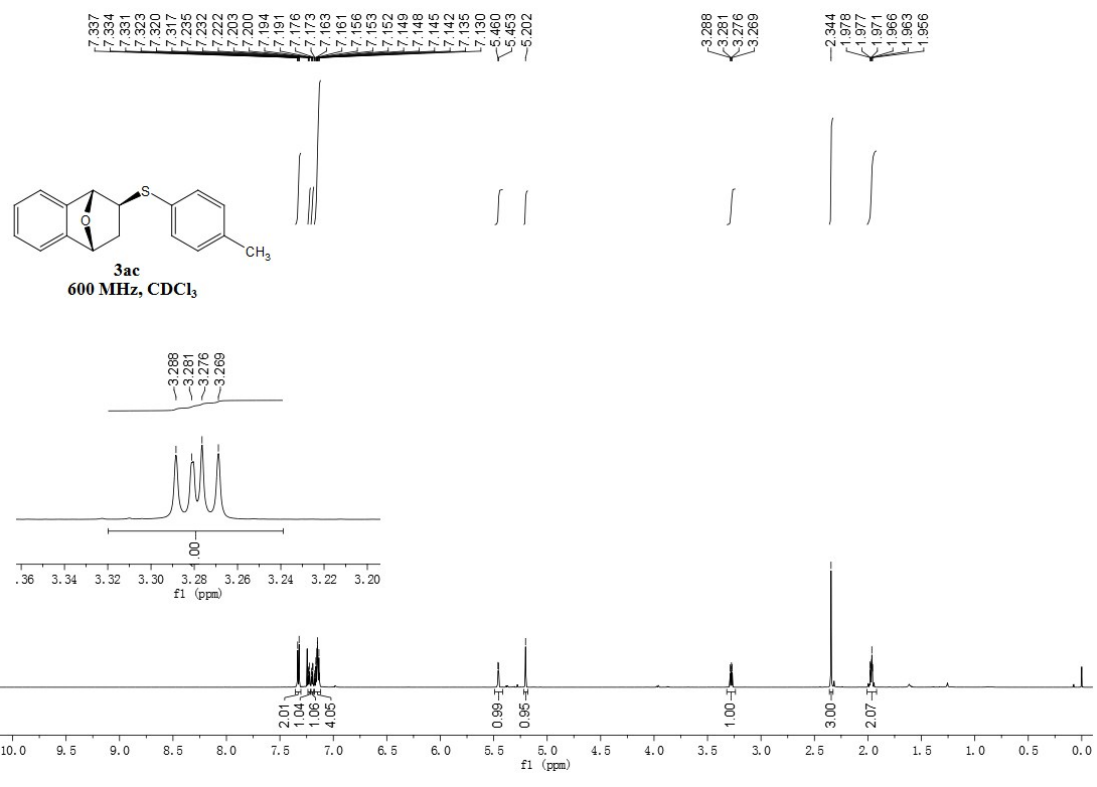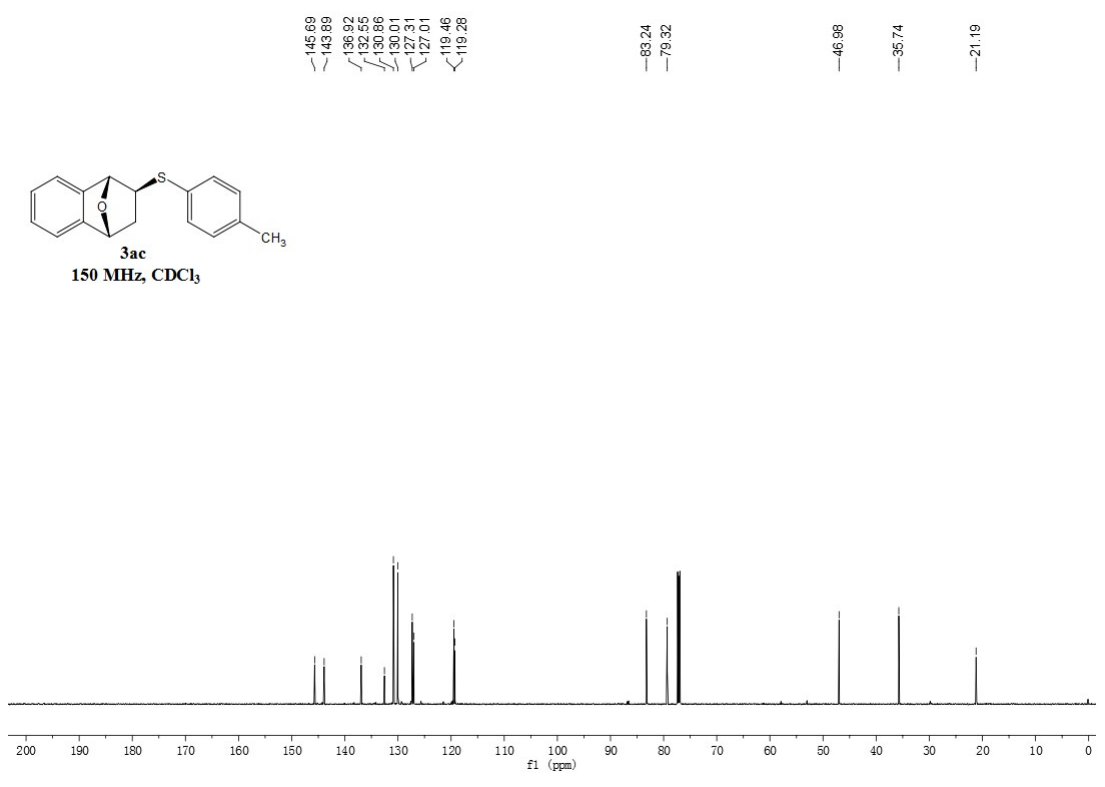

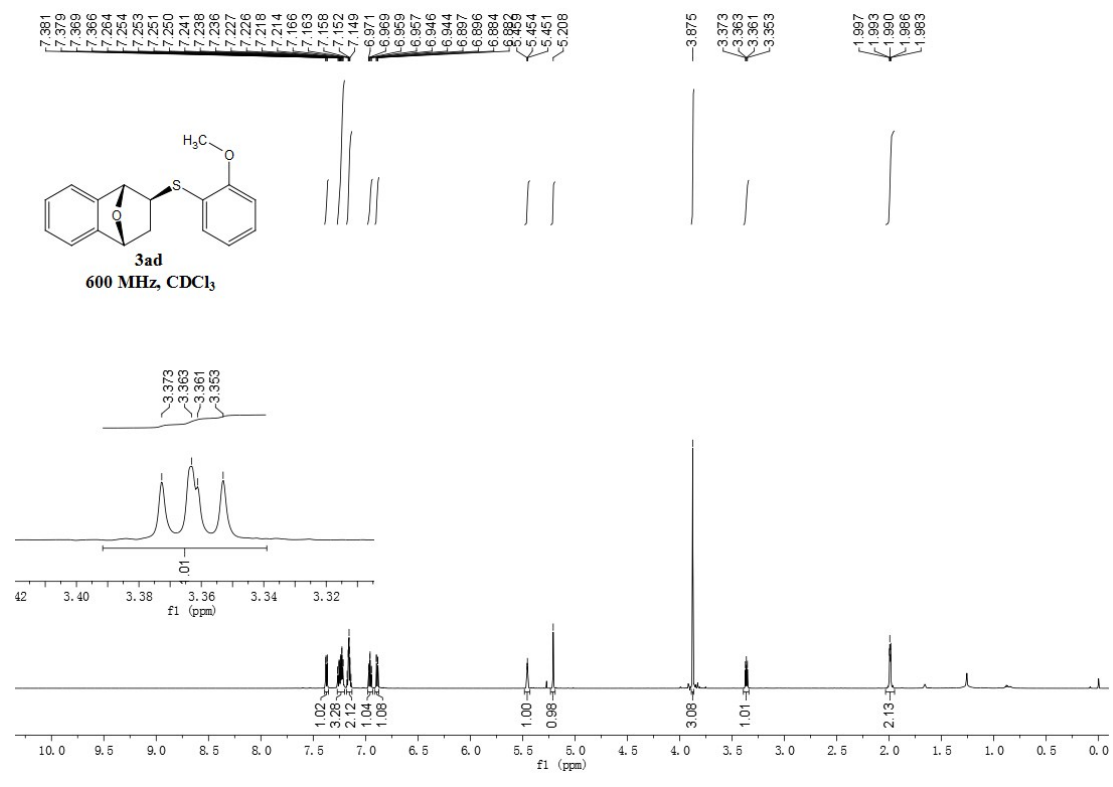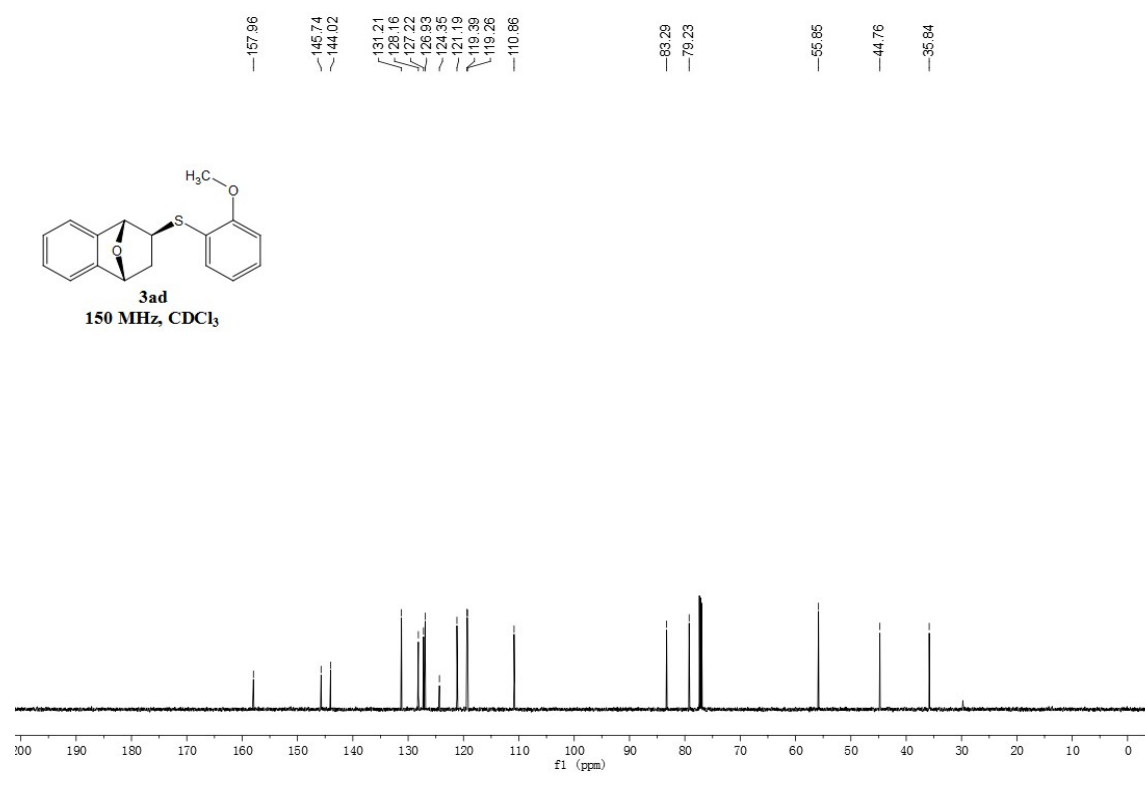

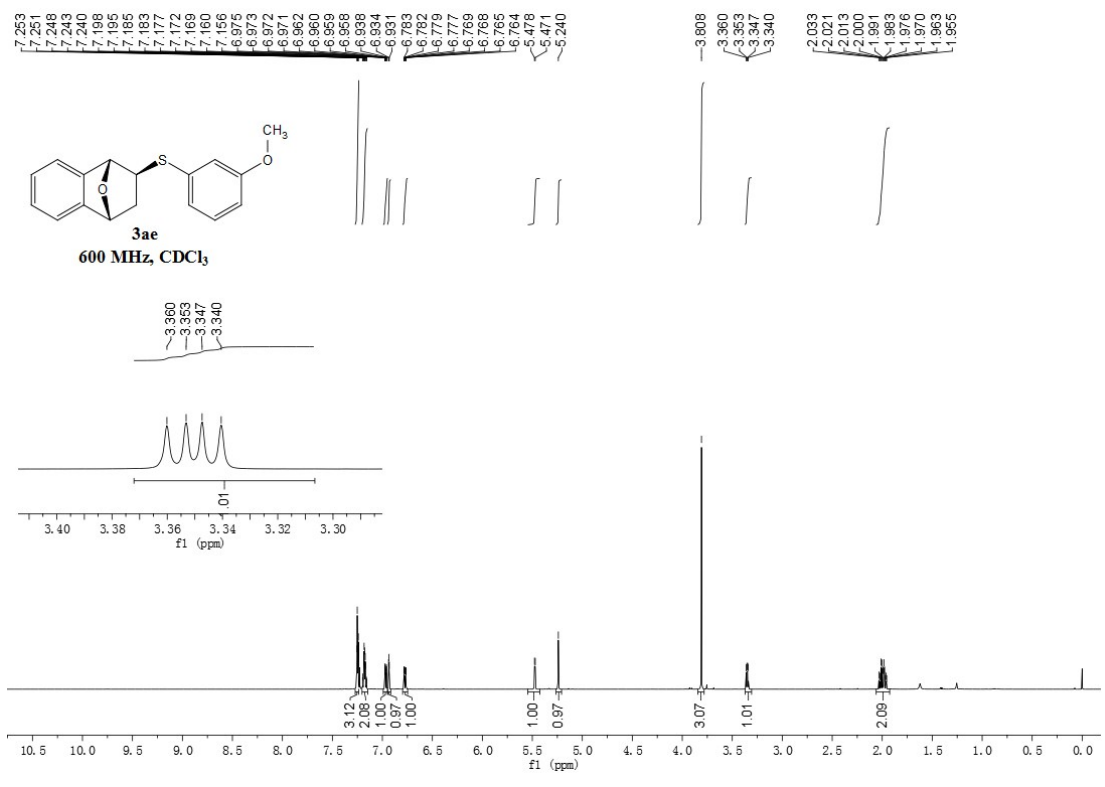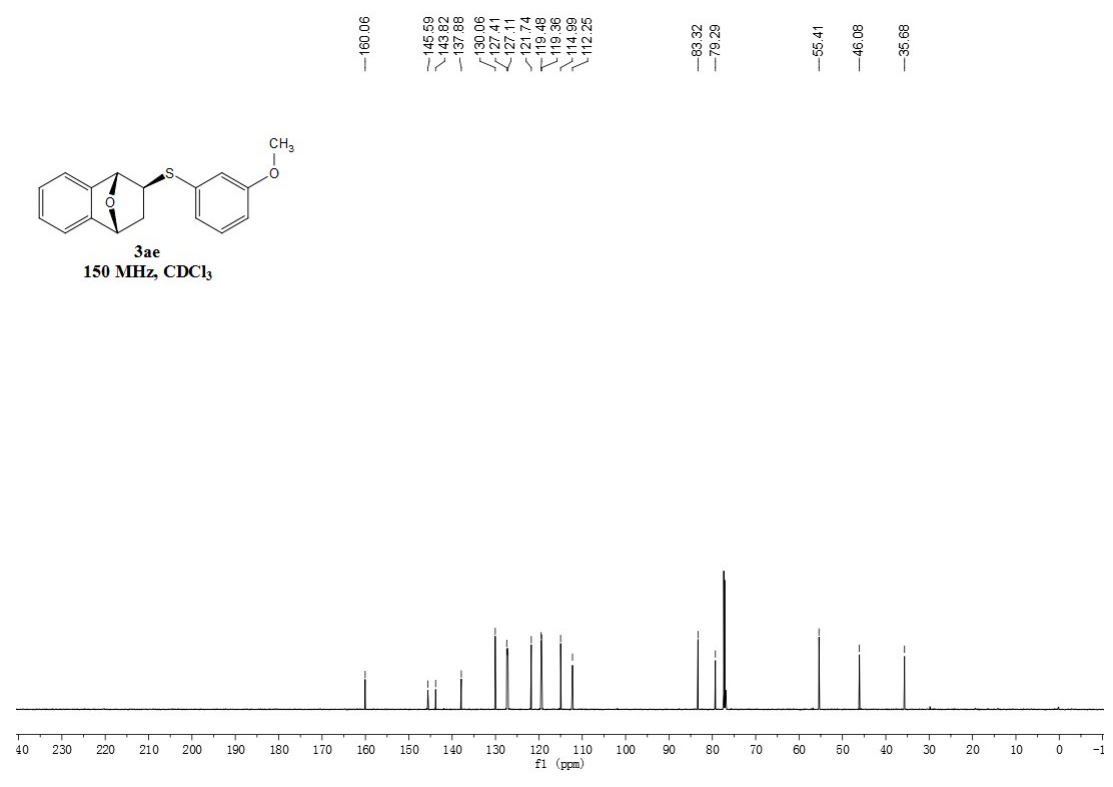



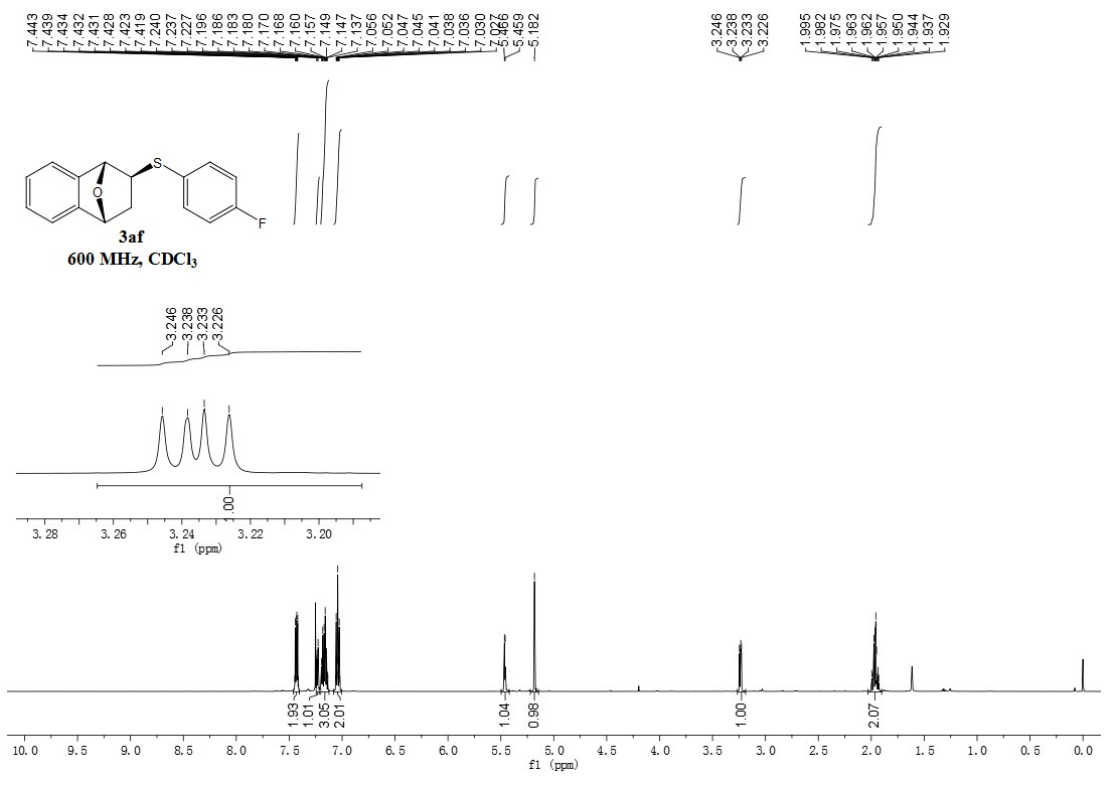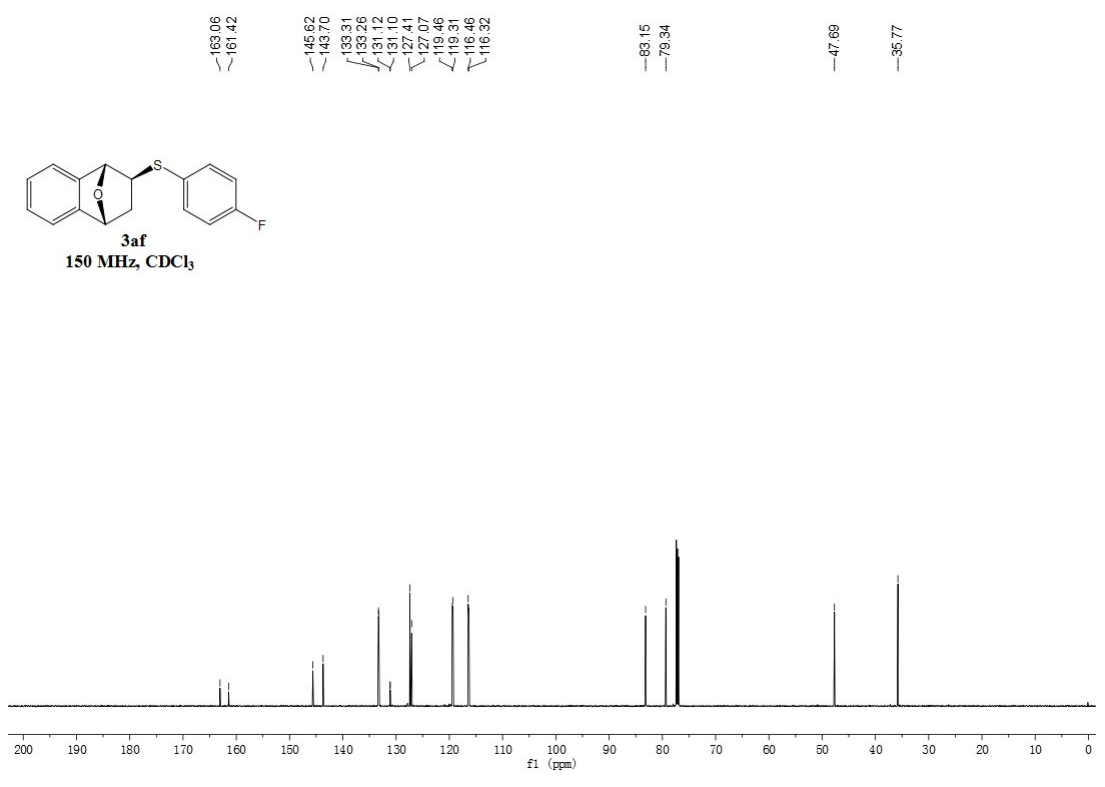

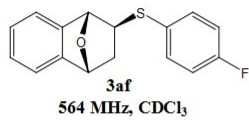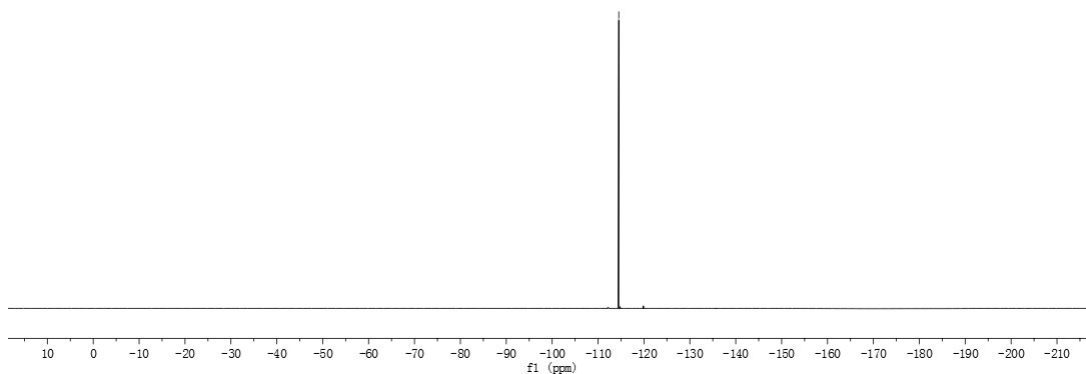

7.417  
 7.415  
 7.404  
 7.402  
 7.398  
 7.395  
 7.344  
 7.342  
 7.288  
 7.280  
 7.277  
 7.275  
 7.265  
 7.263  
 7.258  
 7.254  
 7.252  
 7.250  
 7.212  
 7.203  
 7.201  
 7.199  
 7.195  
 7.190  
 7.188  
 7.187  
 7.184  
 7.174  
 7.171  
 7.161  
 5.503  
 5.497  
 5.242

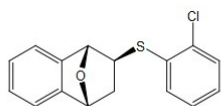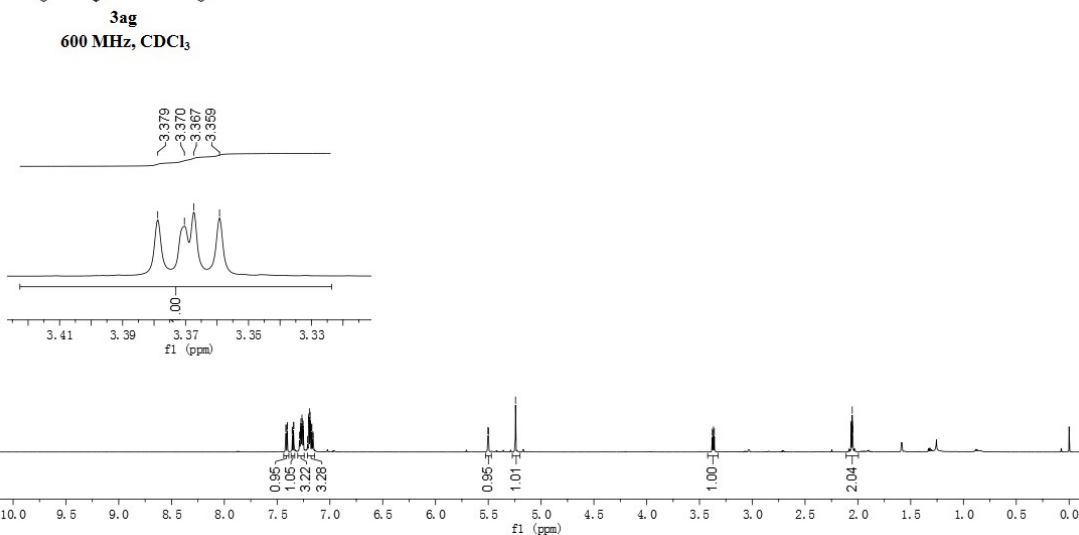

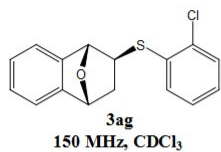

145.58  
 143.71  
 130.14  
 128.51  
 127.53  
 127.40  
 127.21  
 126.46  
 119.44

83.18  
 79.29

45.13  
 35.79

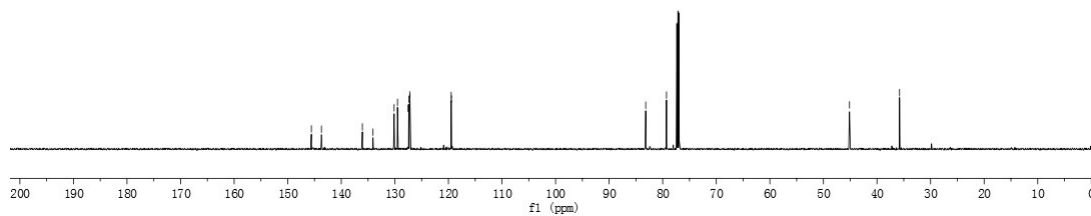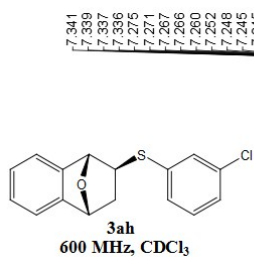

7.341  
 7.339  
 7.337  
 7.336  
 7.275  
 7.271  
 7.267  
 7.266  
 7.260  
 7.252  
 7.248  
 7.245  
 7.241  
 7.235  
 7.228  
 7.205  
 7.202  
 7.196  
 7.193  
 7.190  
 7.189  
 7.186  
 7.182  
 7.179  
 5.482  
 5.474  
 5.221

3.342  
 3.335  
 3.329  
 3.322  
 2.046  
 2.035  
 2.025  
 2.004  
 1.984  
 1.976  
 1.970  
 1.963  
 1.956

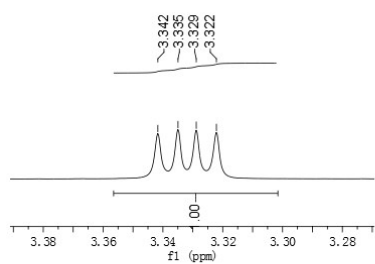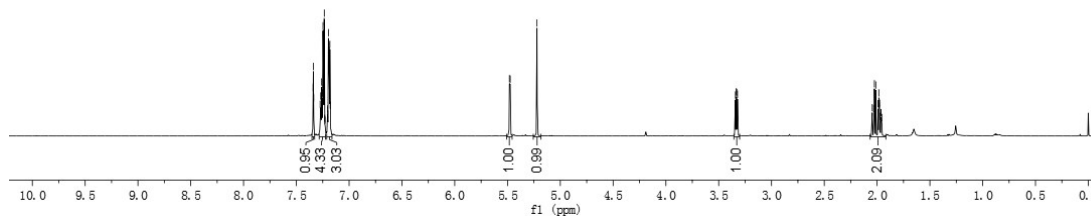

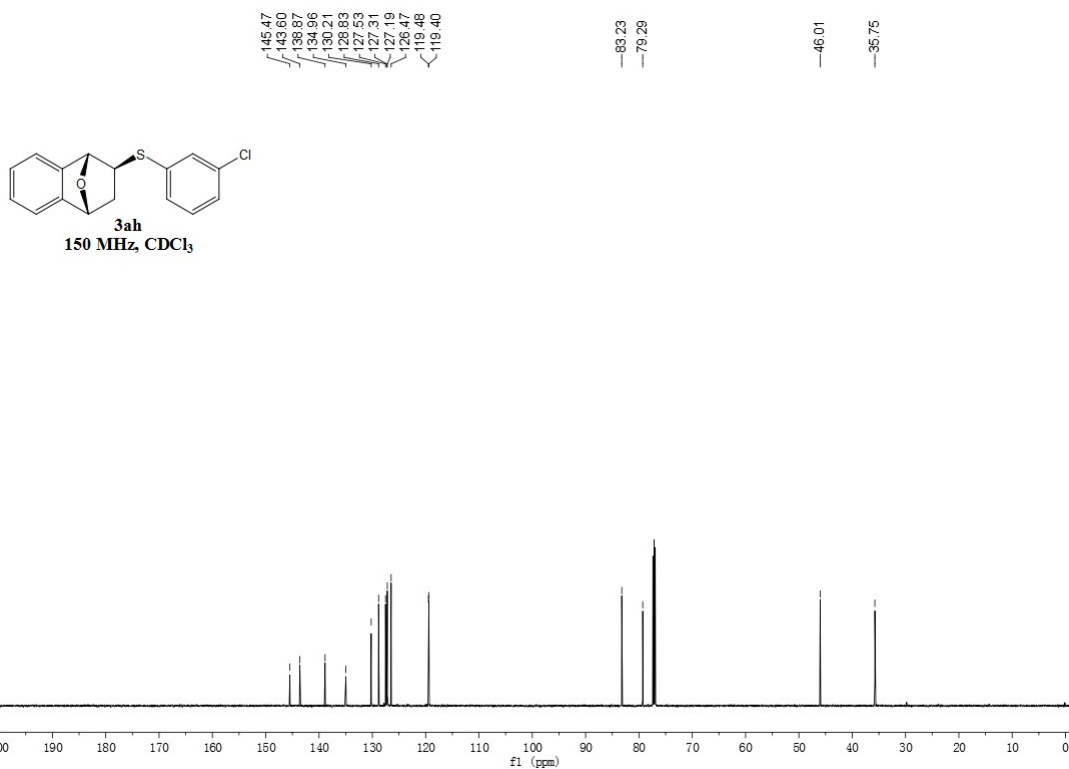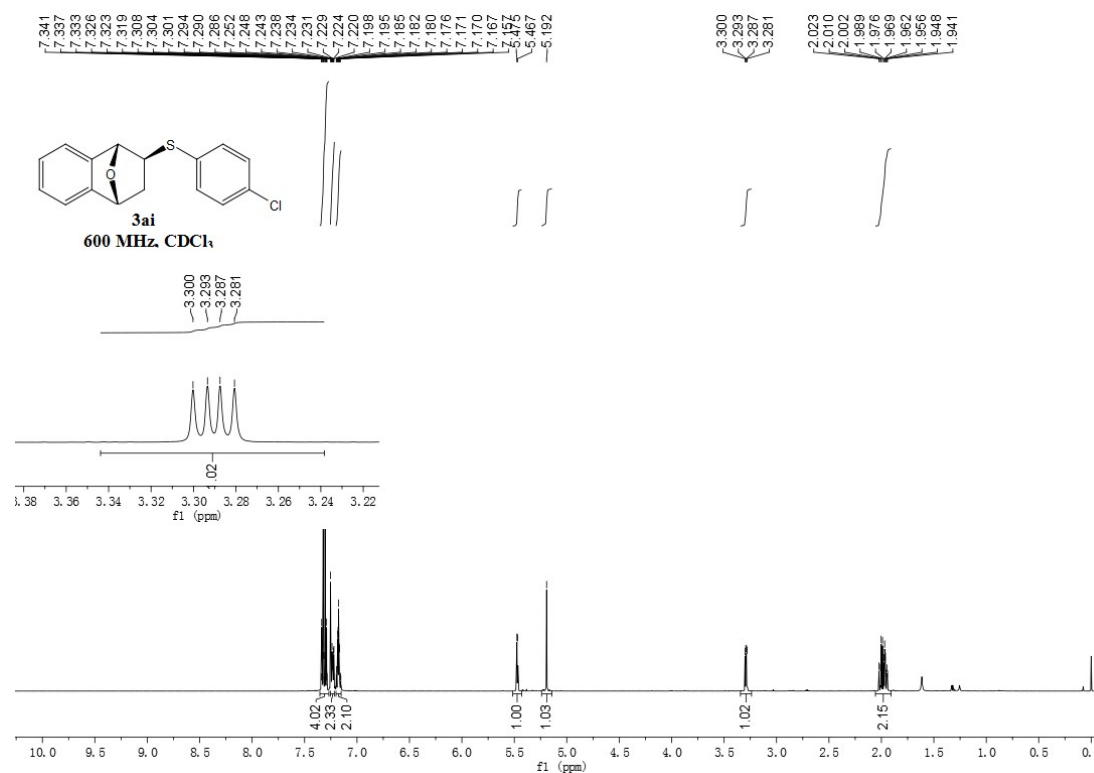

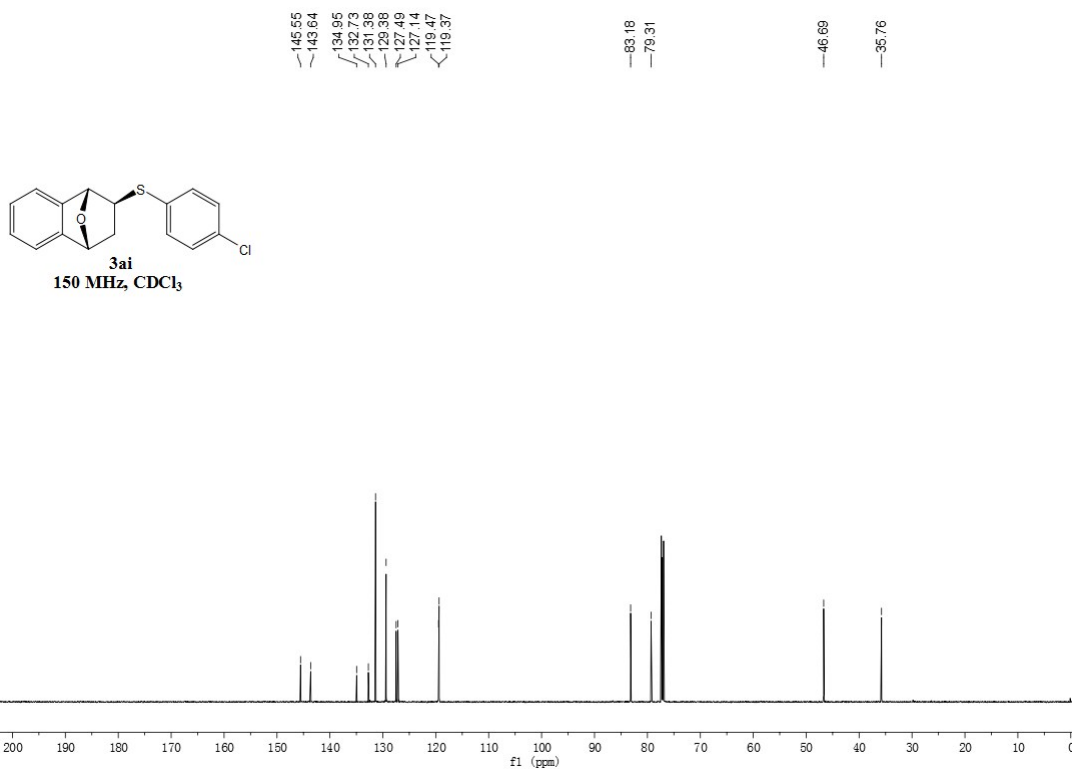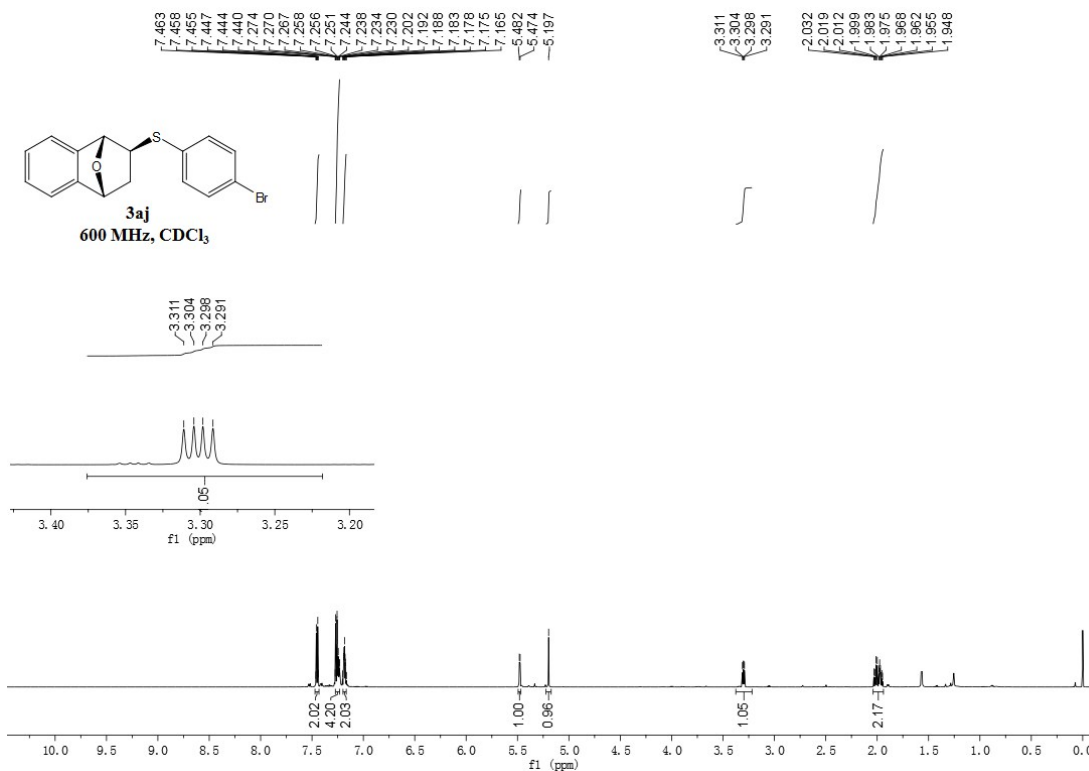

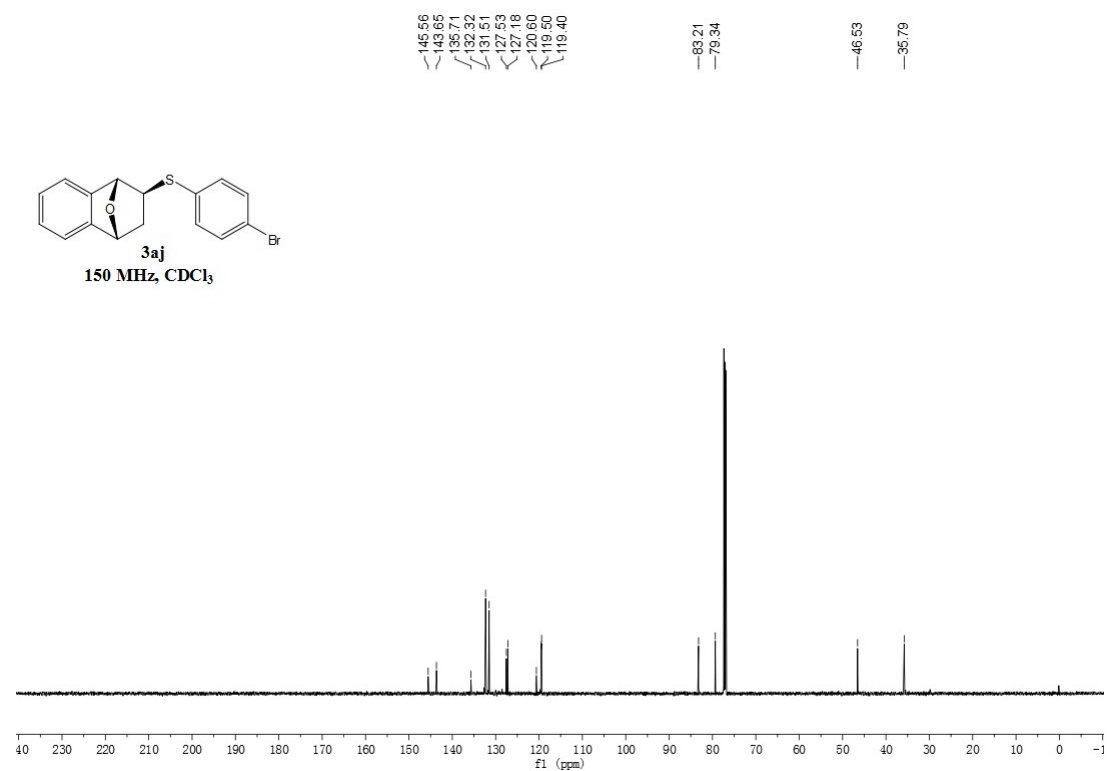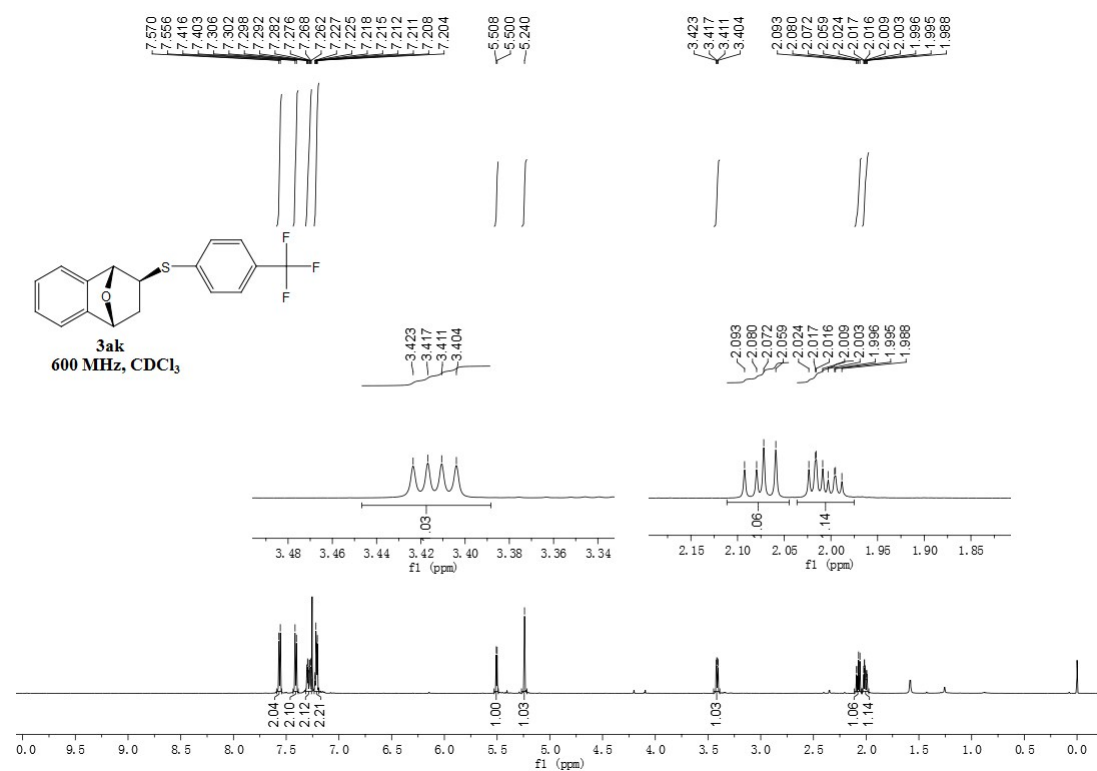

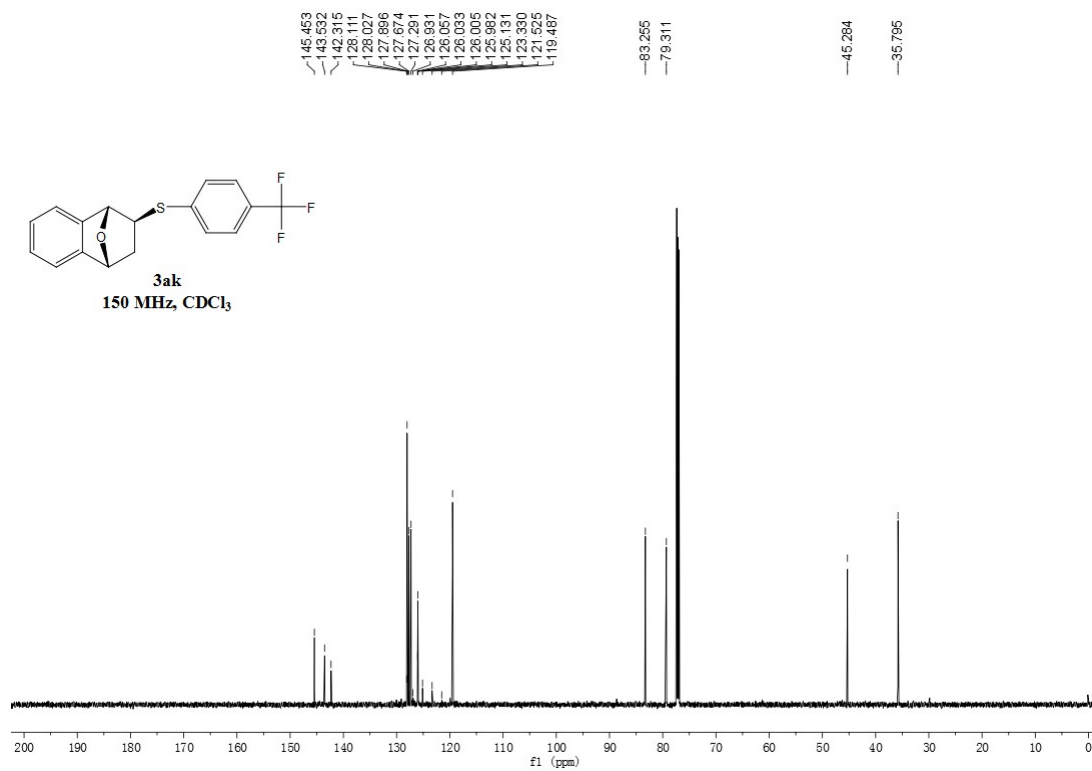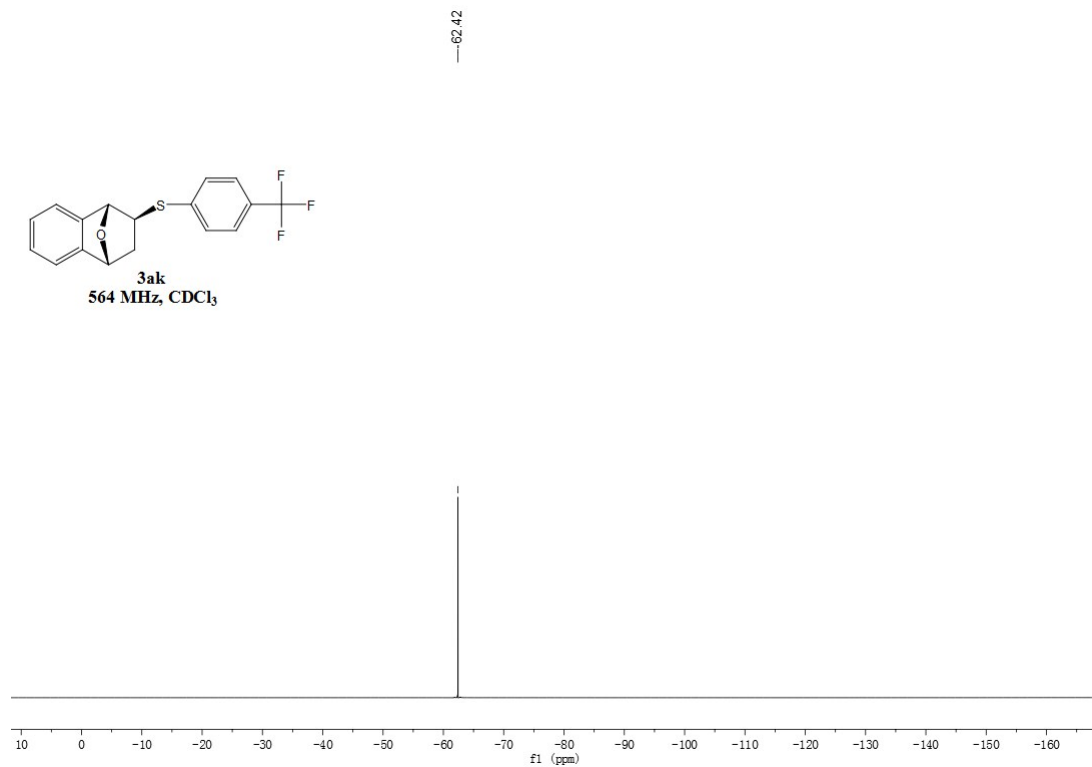

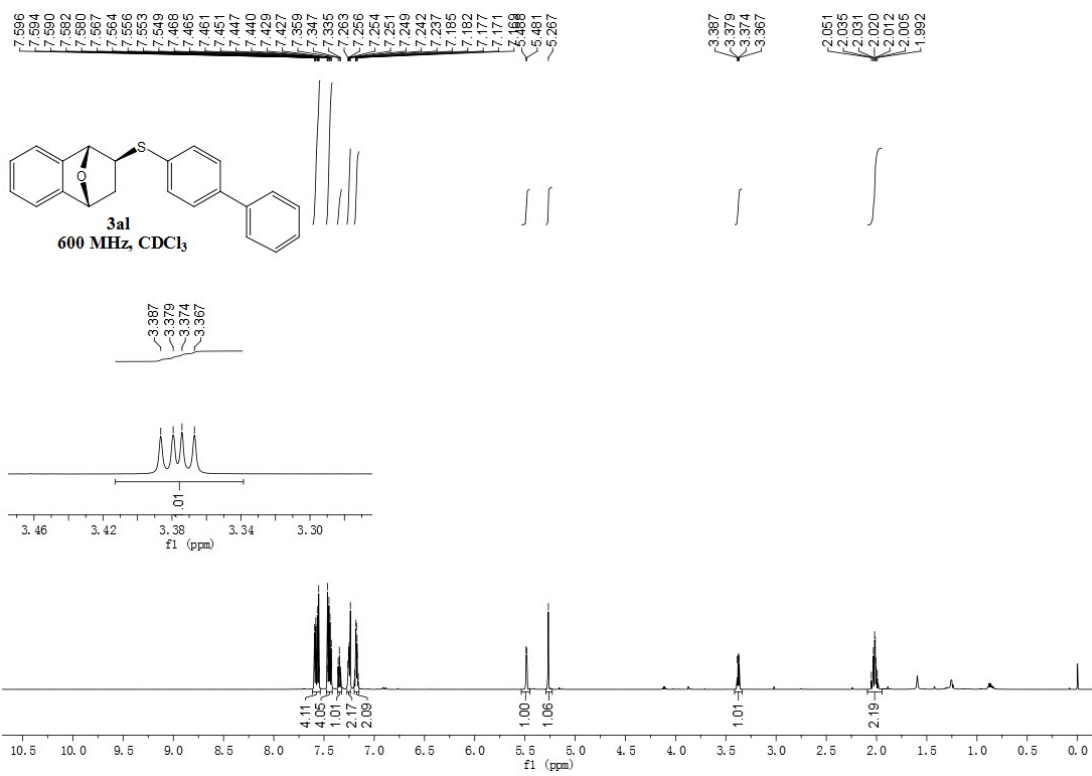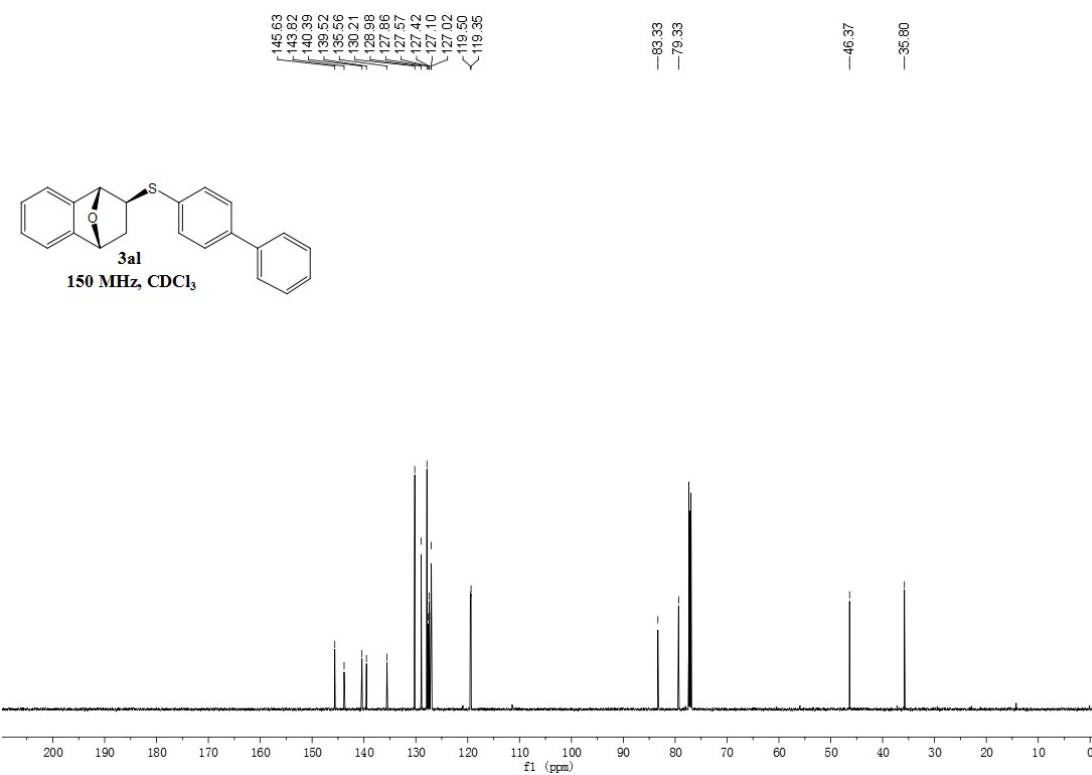



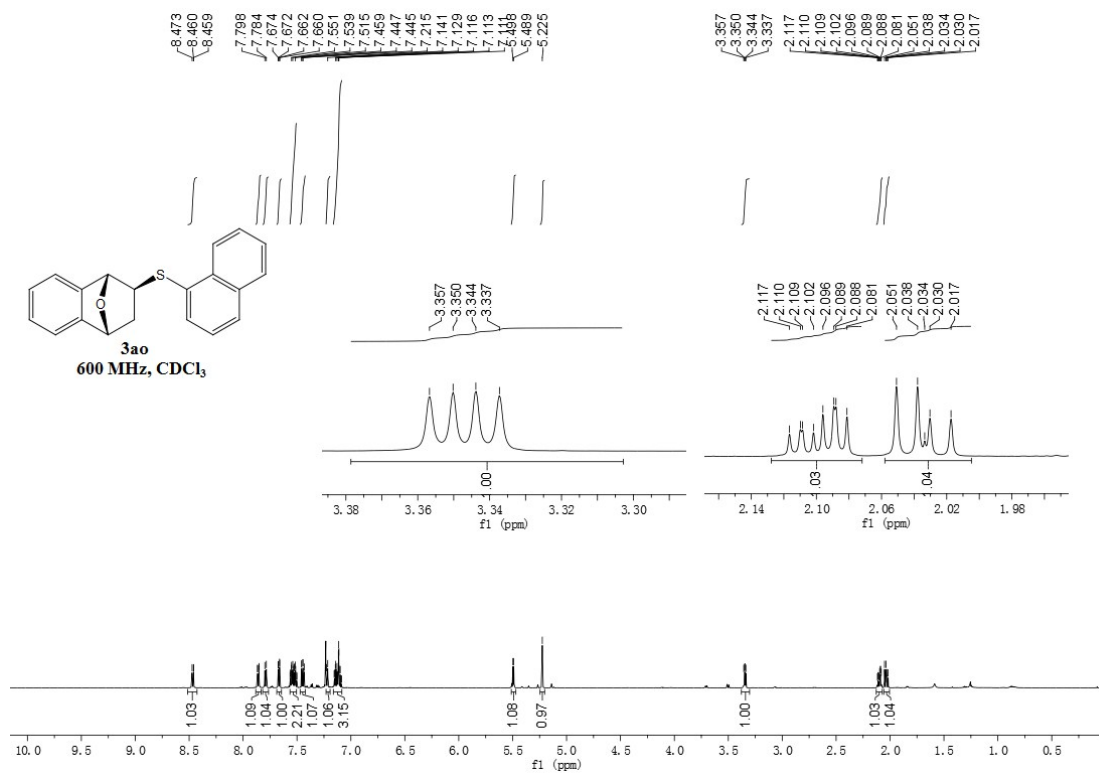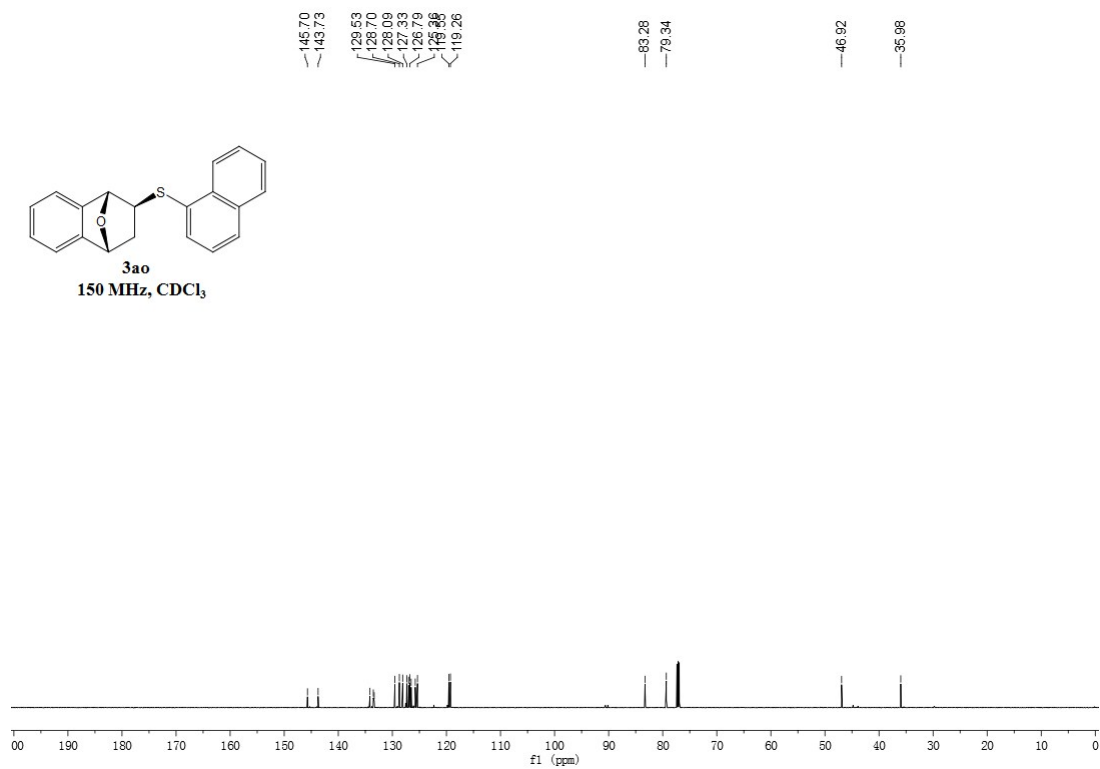

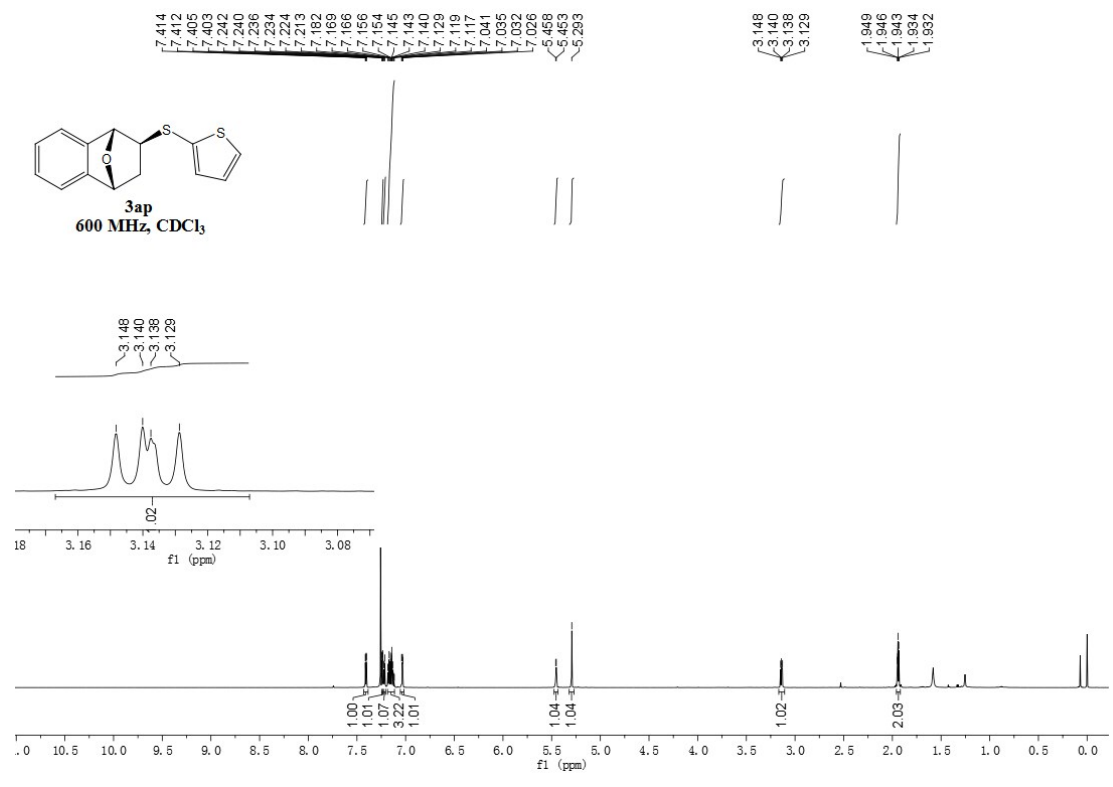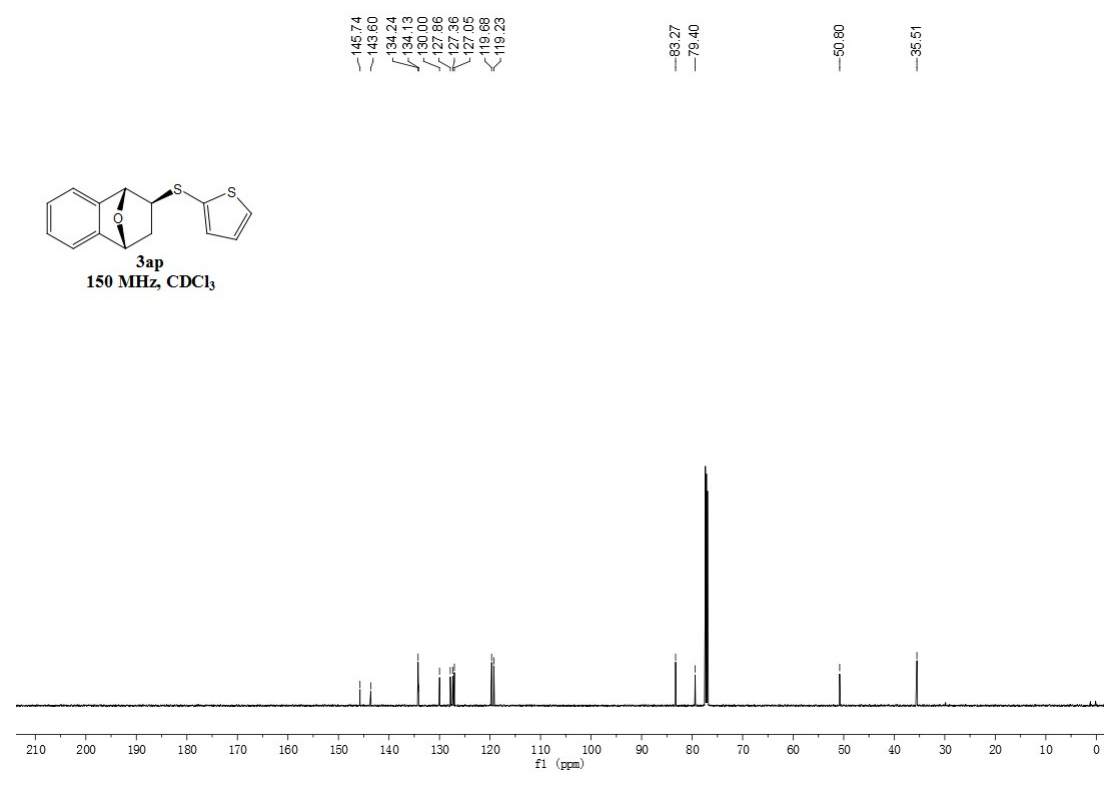

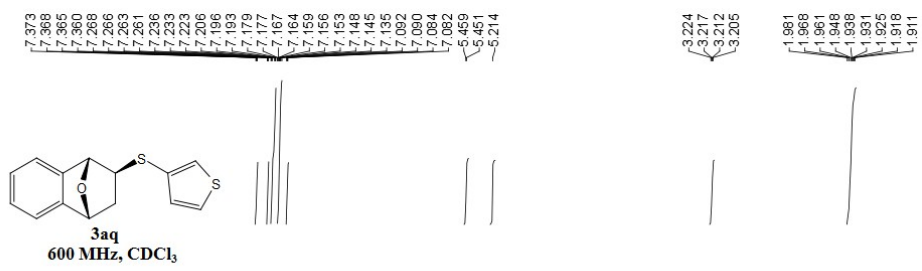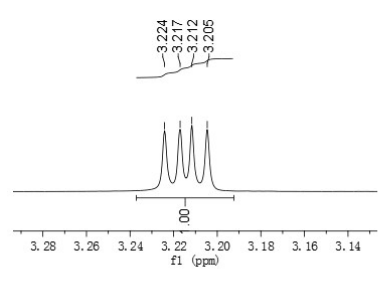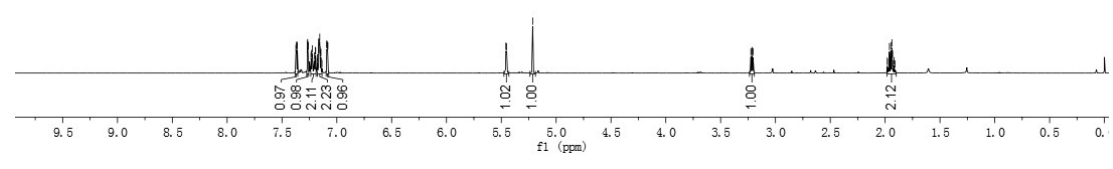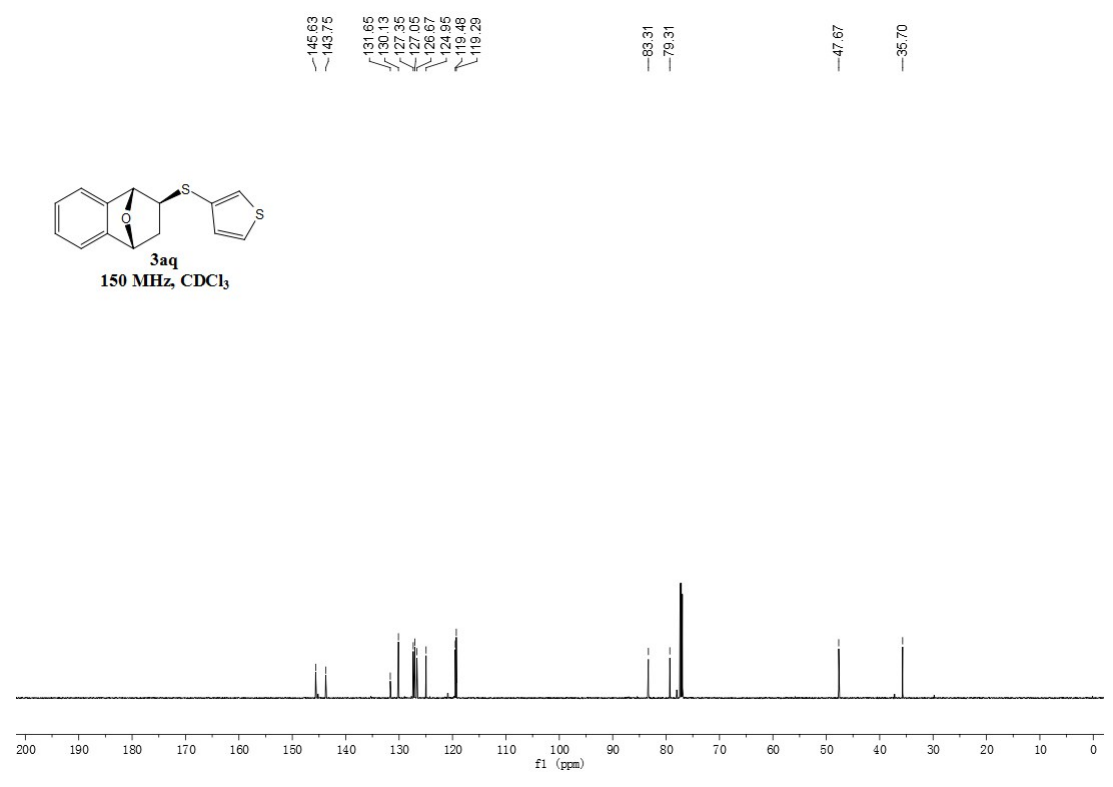

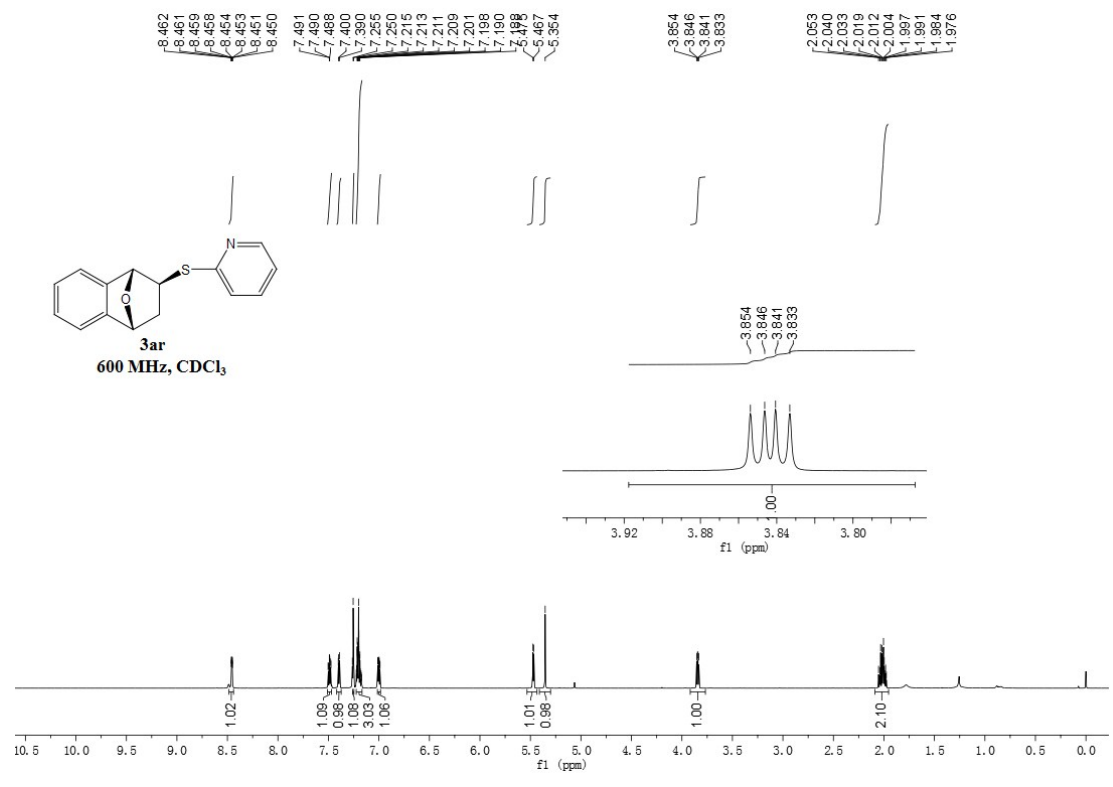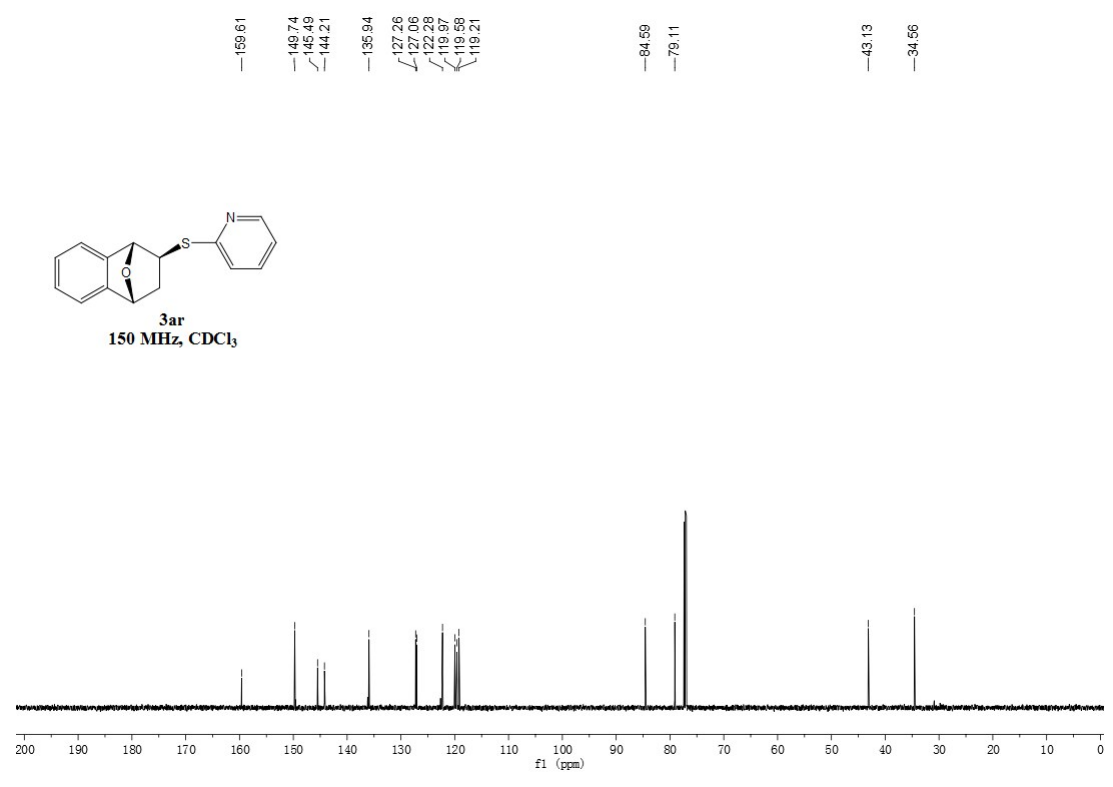

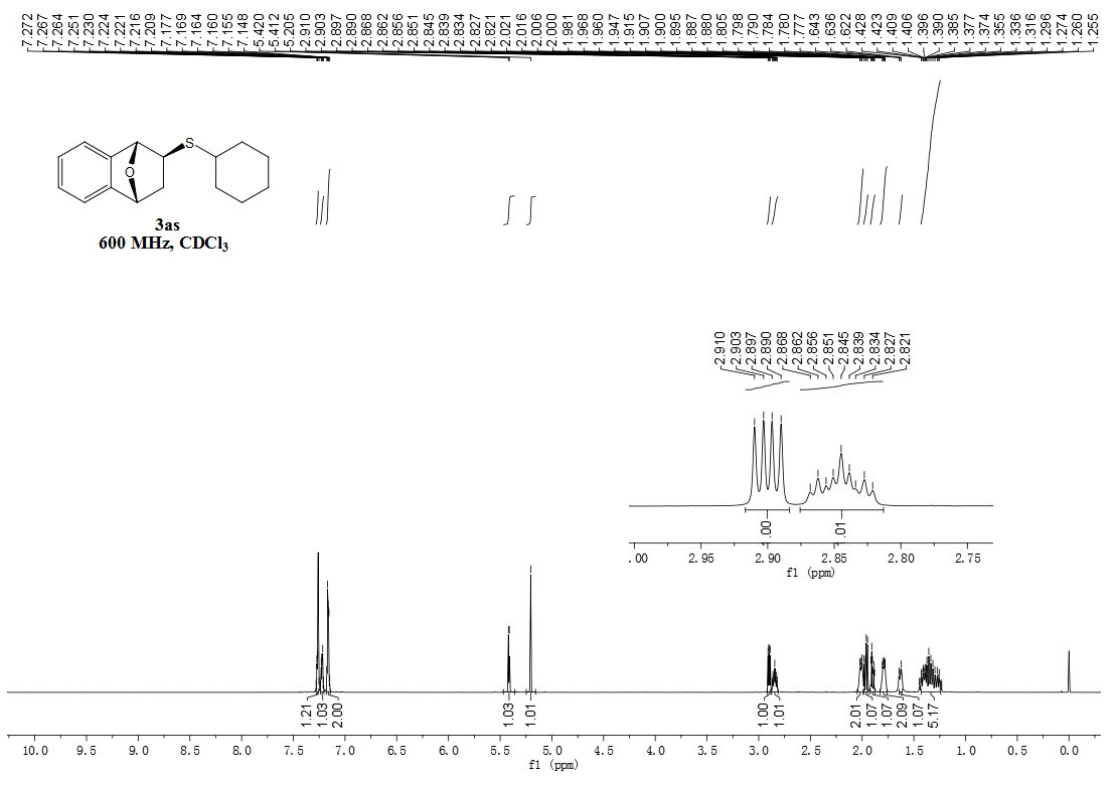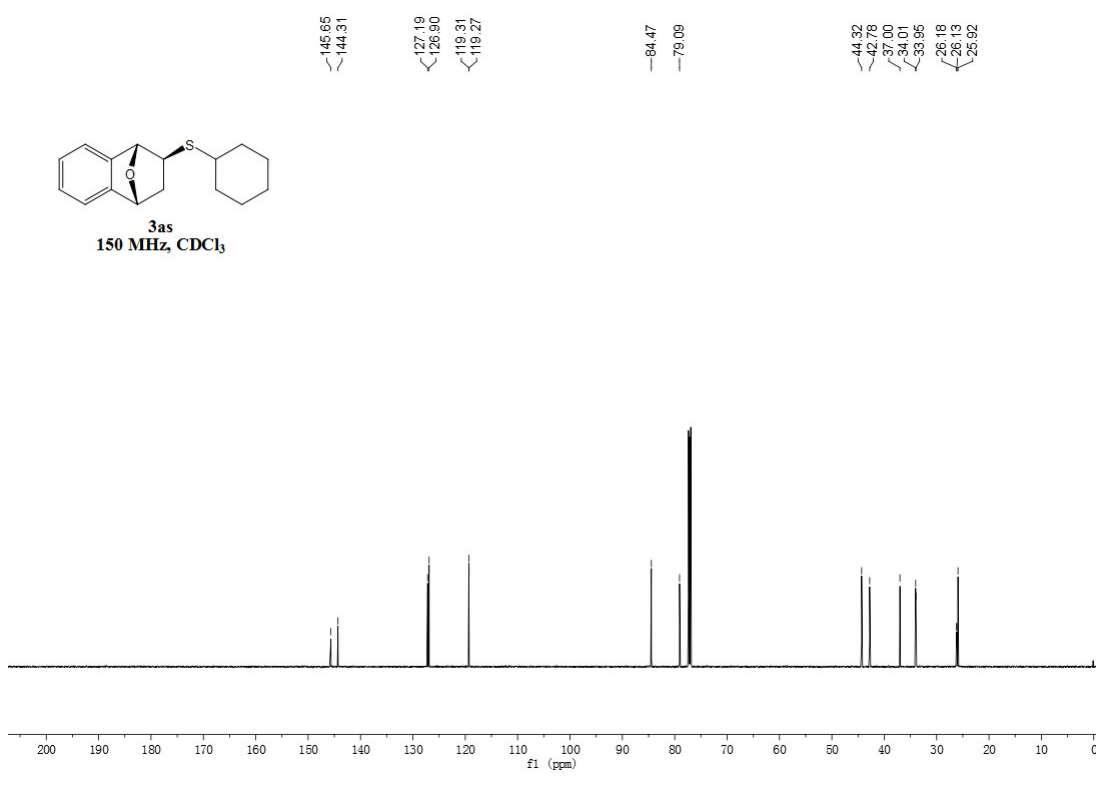

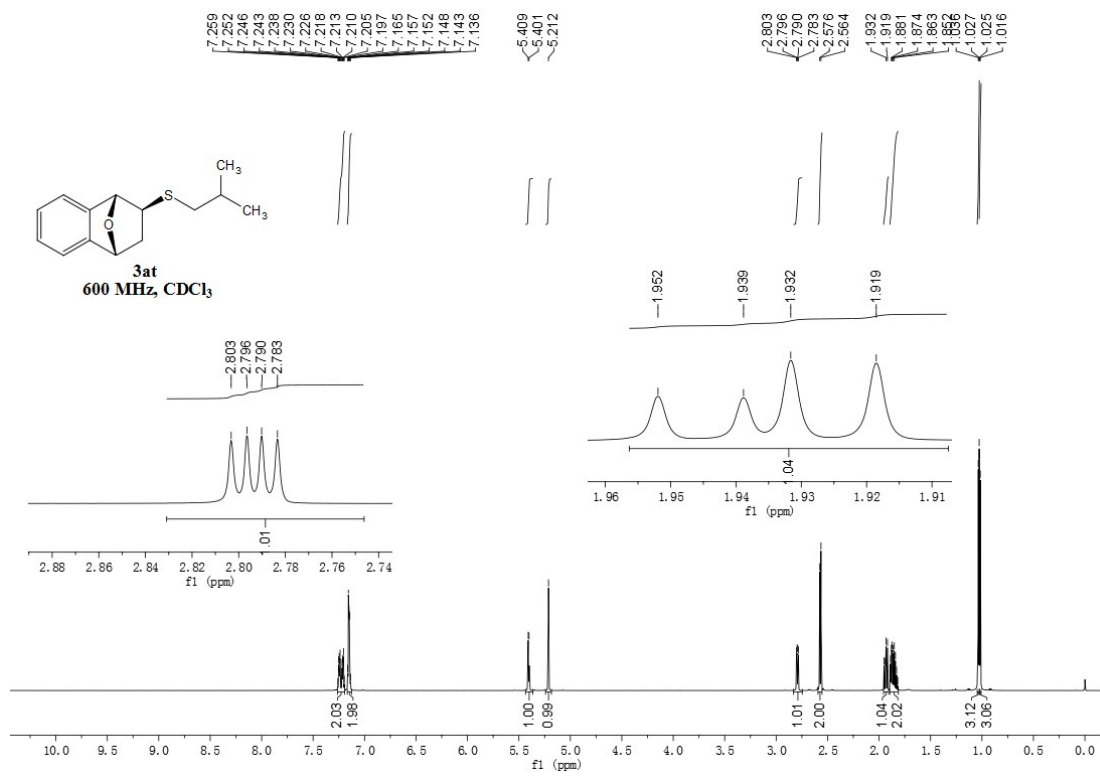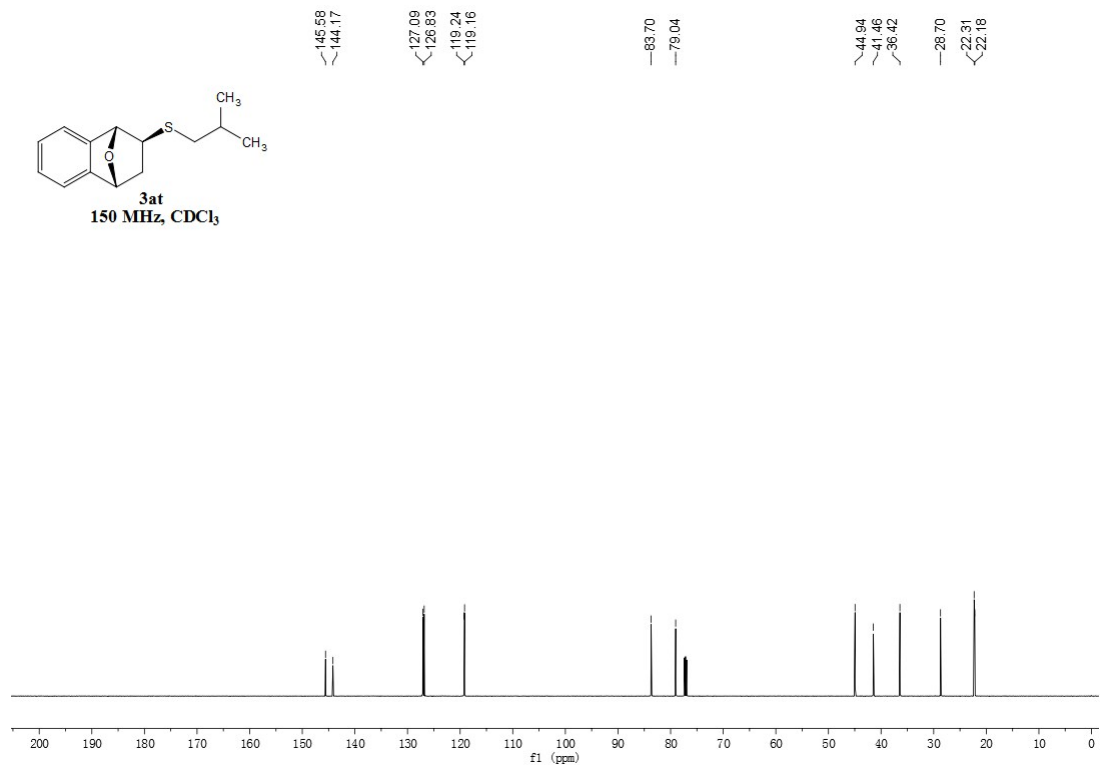

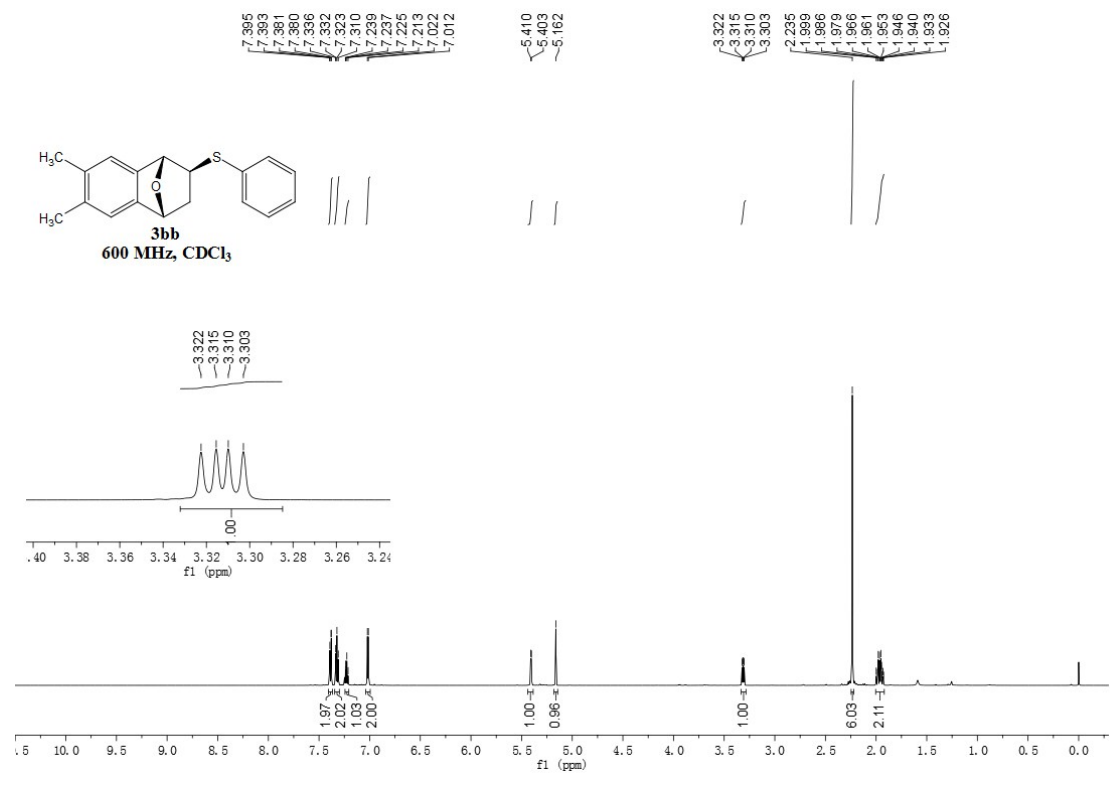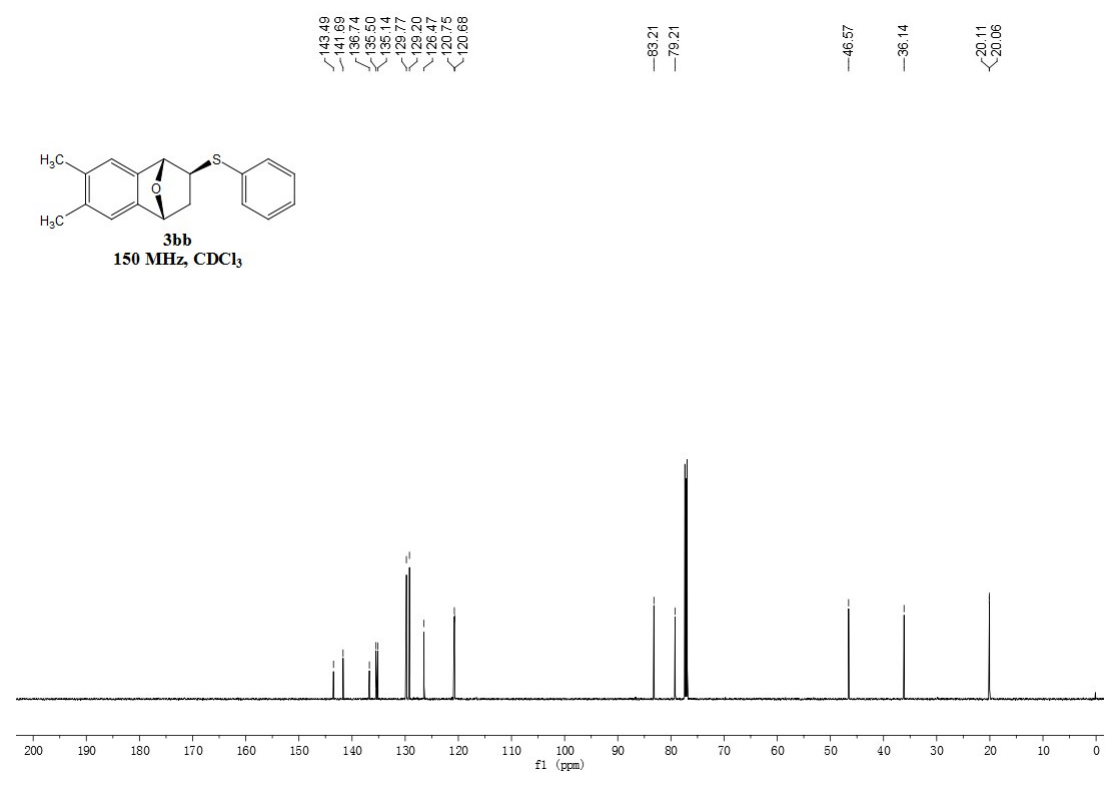

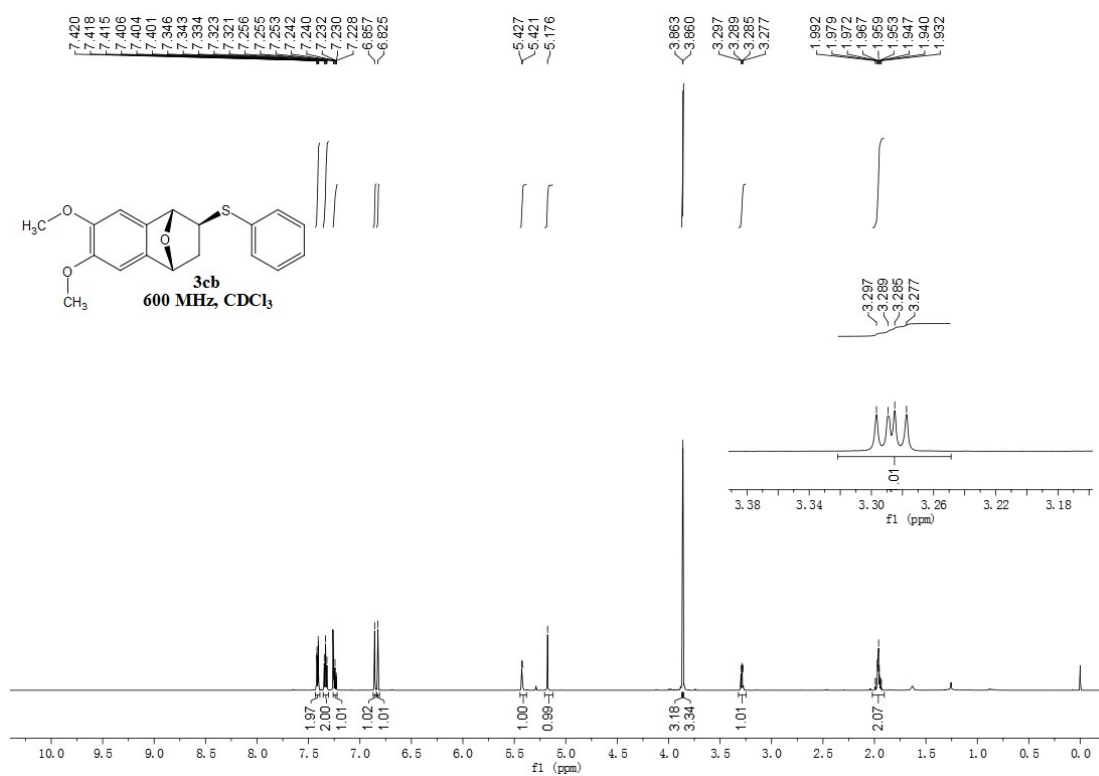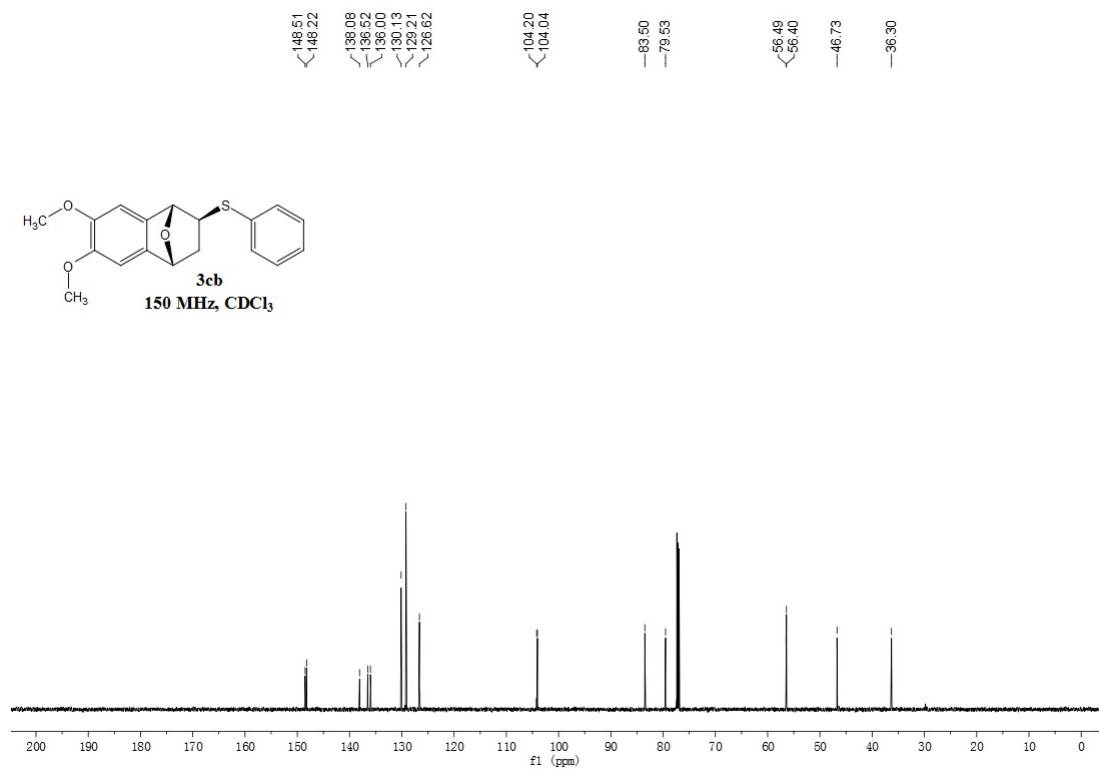



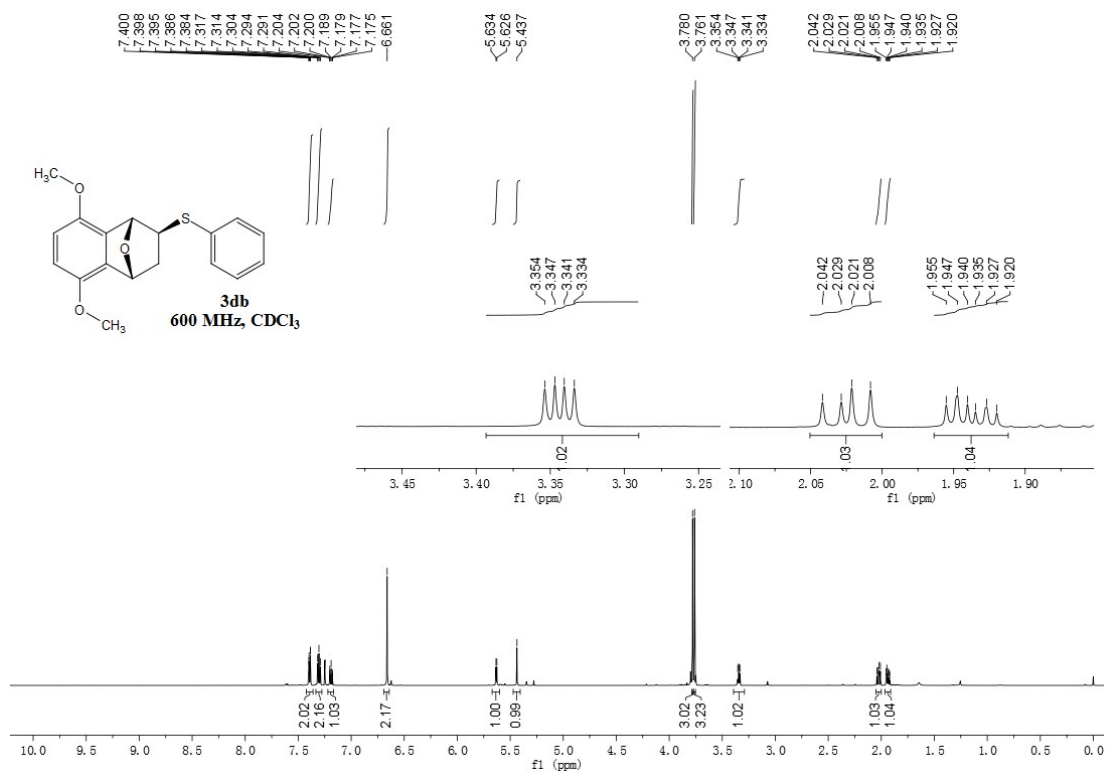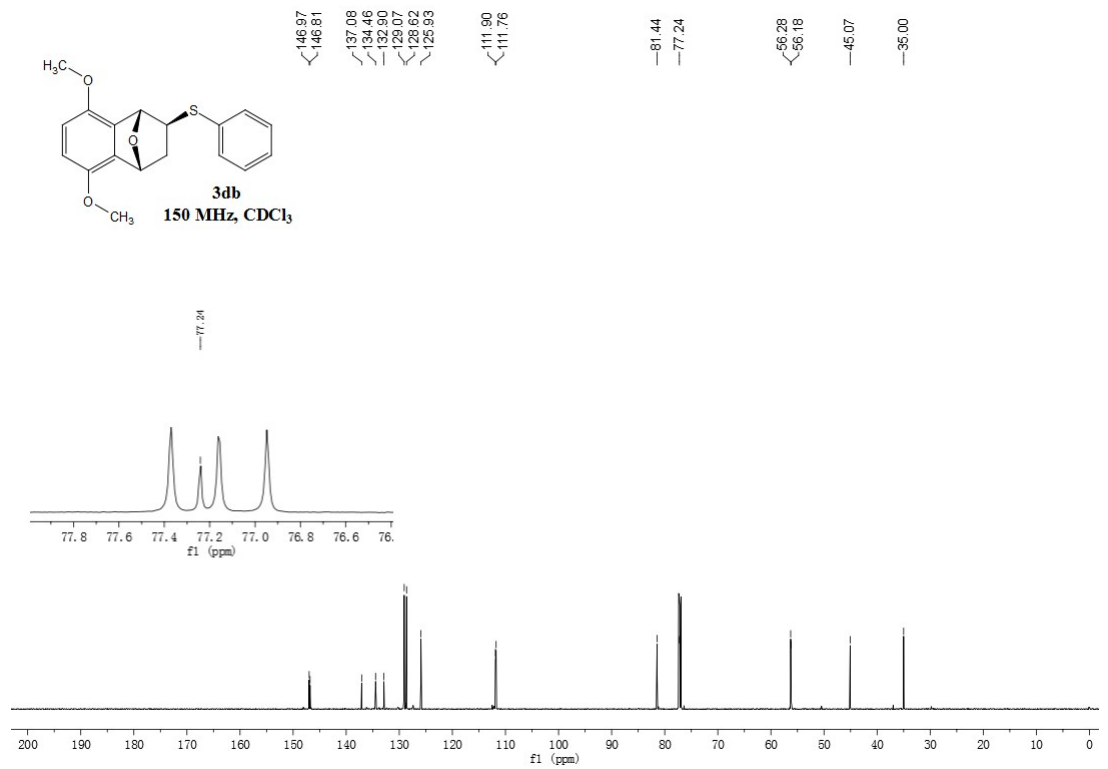

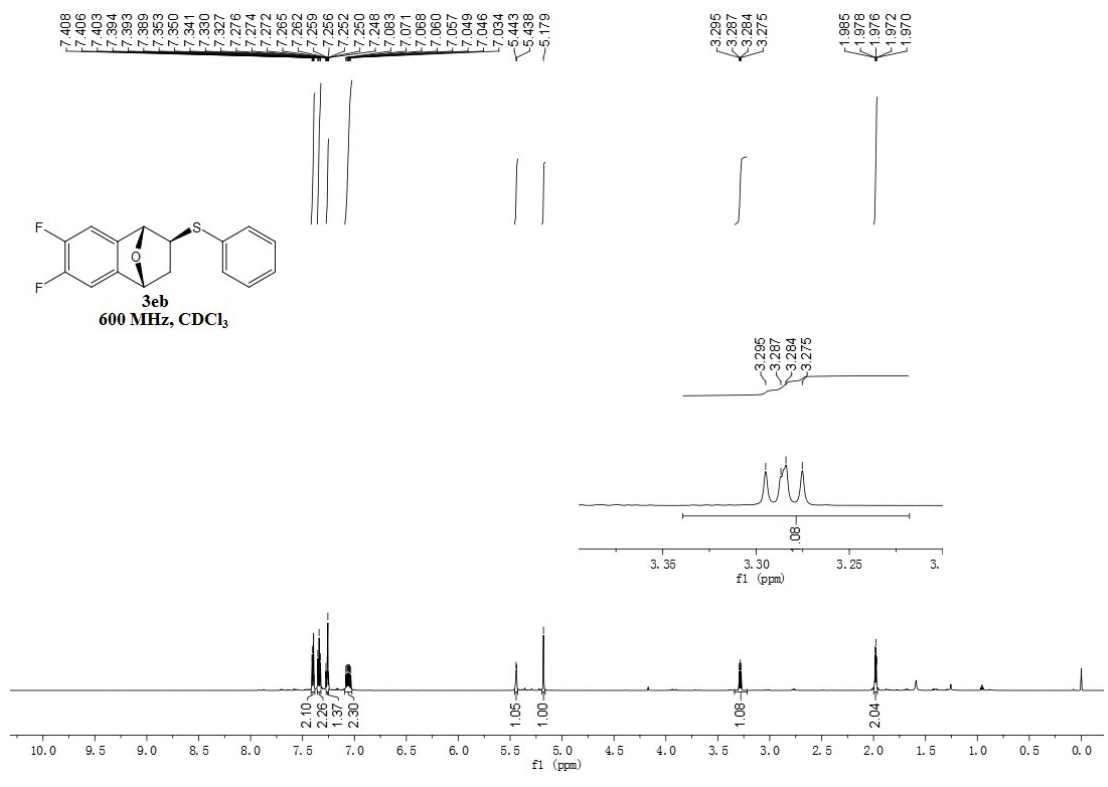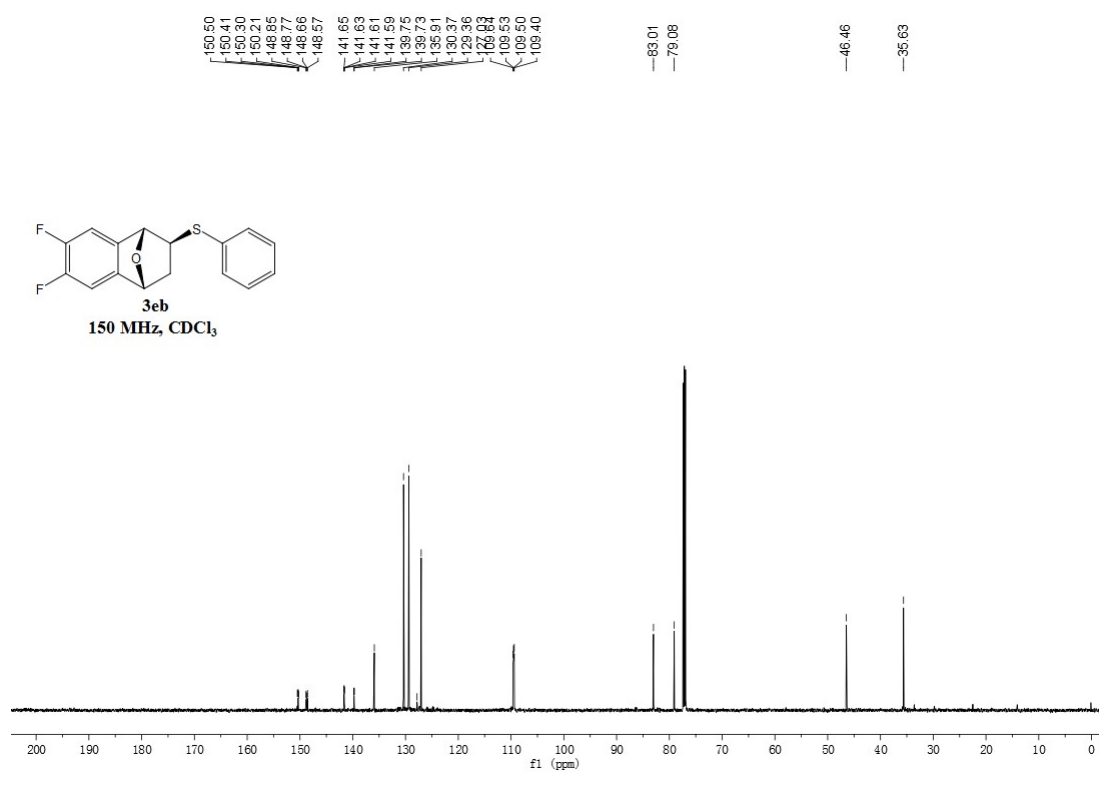

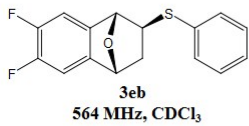

-138.485  
 -138.519  
 -138.848  
 -138.963

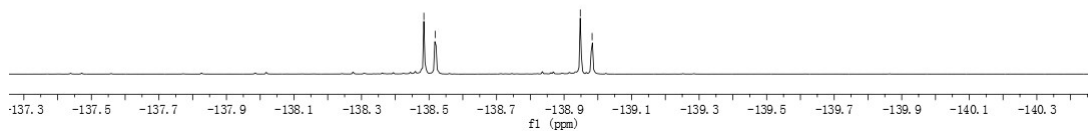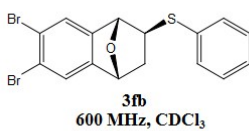

7.501, 7.468, 7.405, 7.383, 7.377, 7.371, 7.361, 7.278, 7.266, 7.257, 5.423, 5.416, 5.158, 3.311, 3.303, 3.298, 3.291, 2.022, 2.009, 2.001, 1.993, 1.975, 1.969, 1.961, 1.954

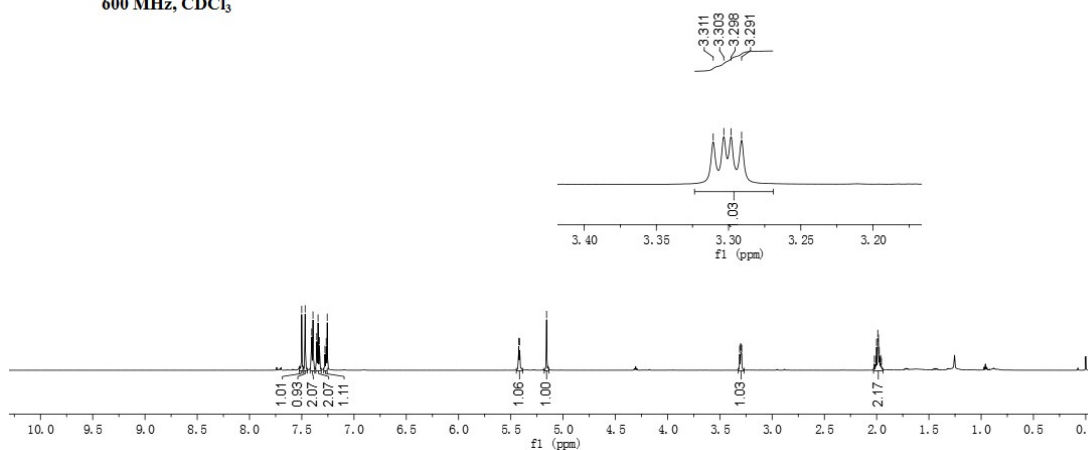

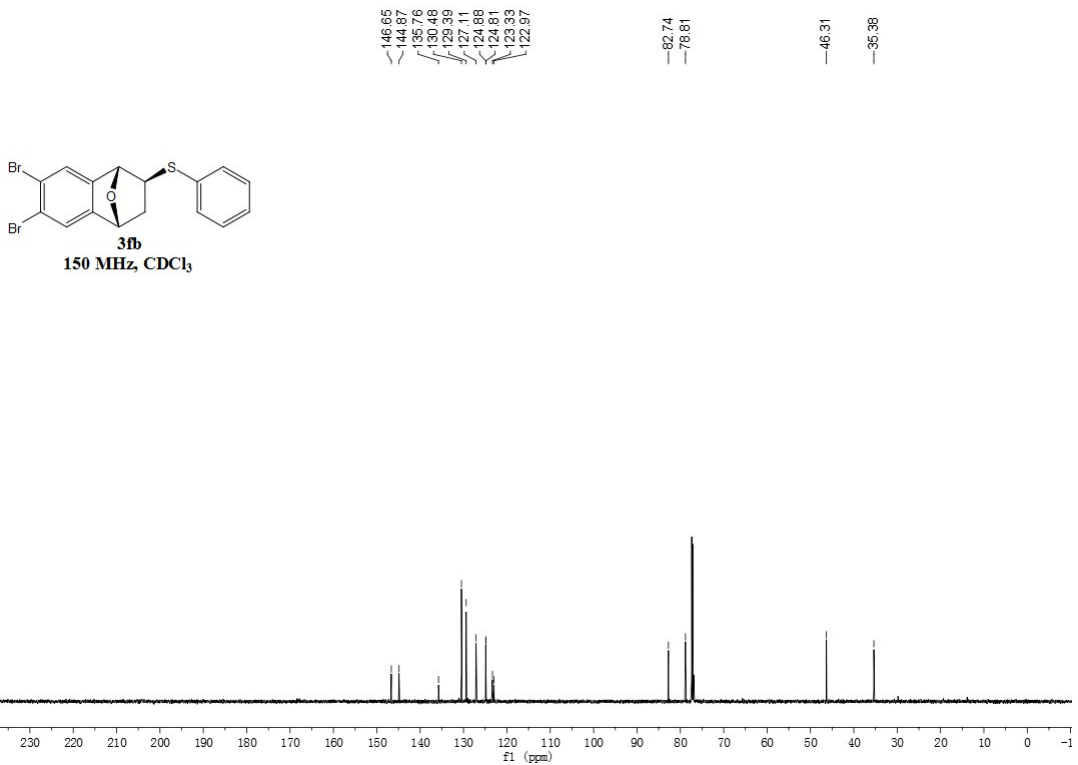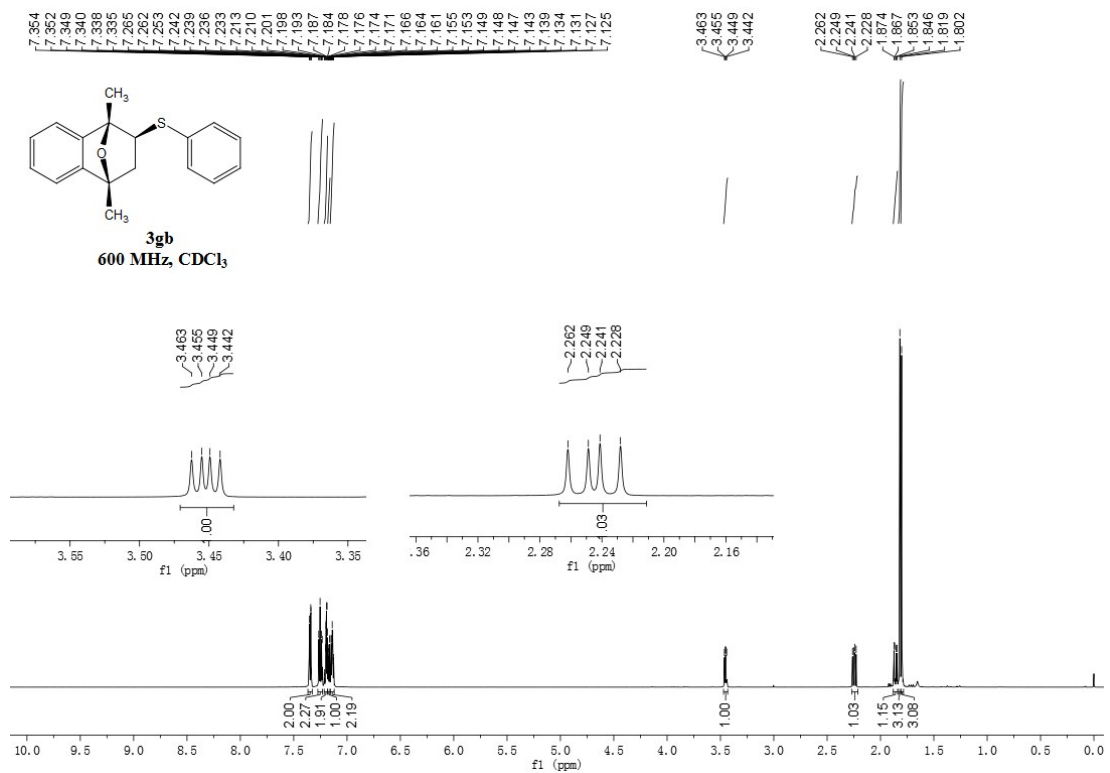

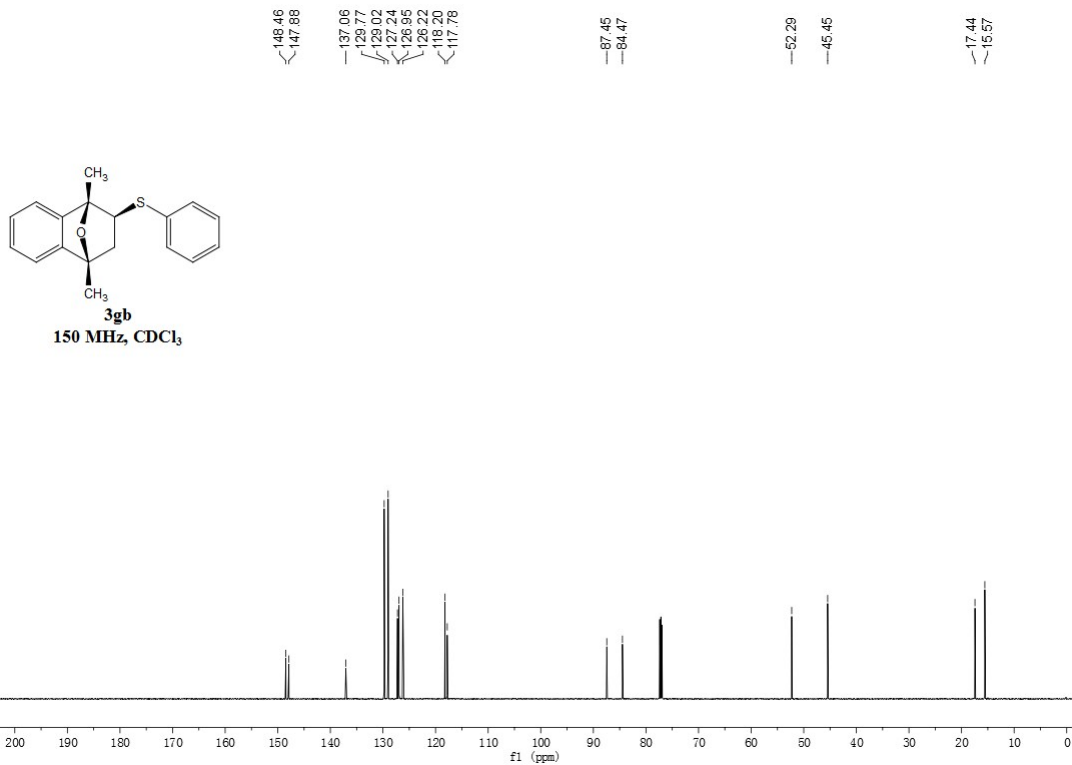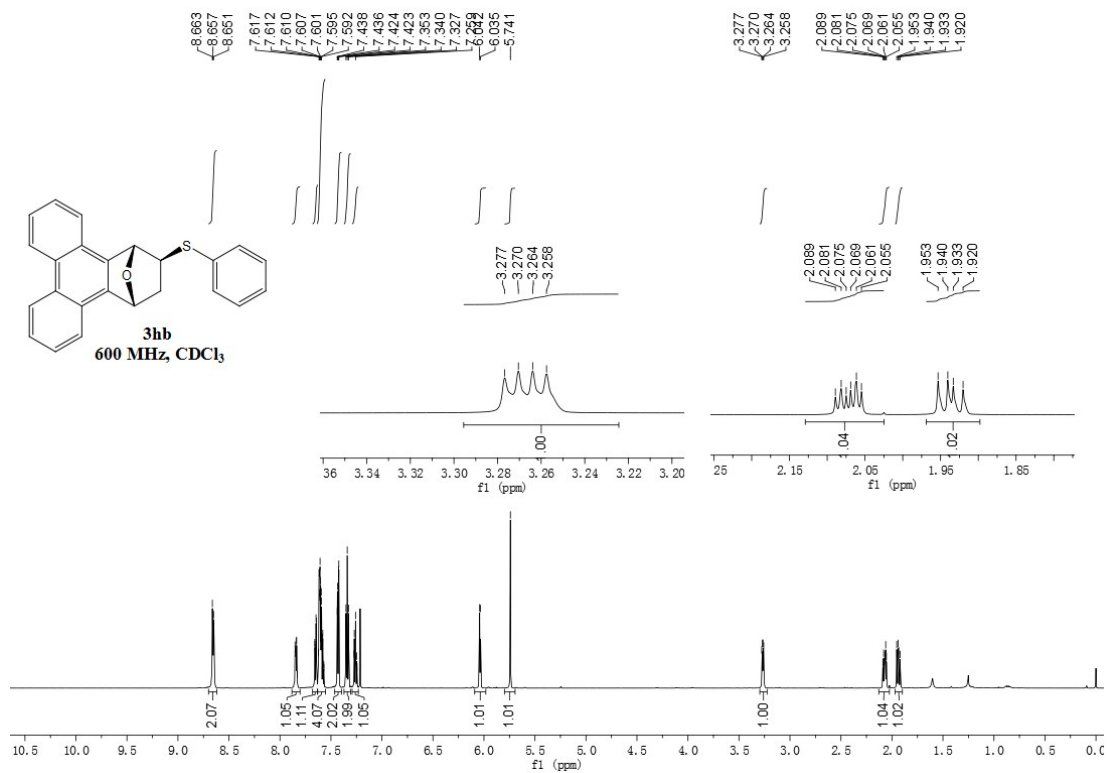

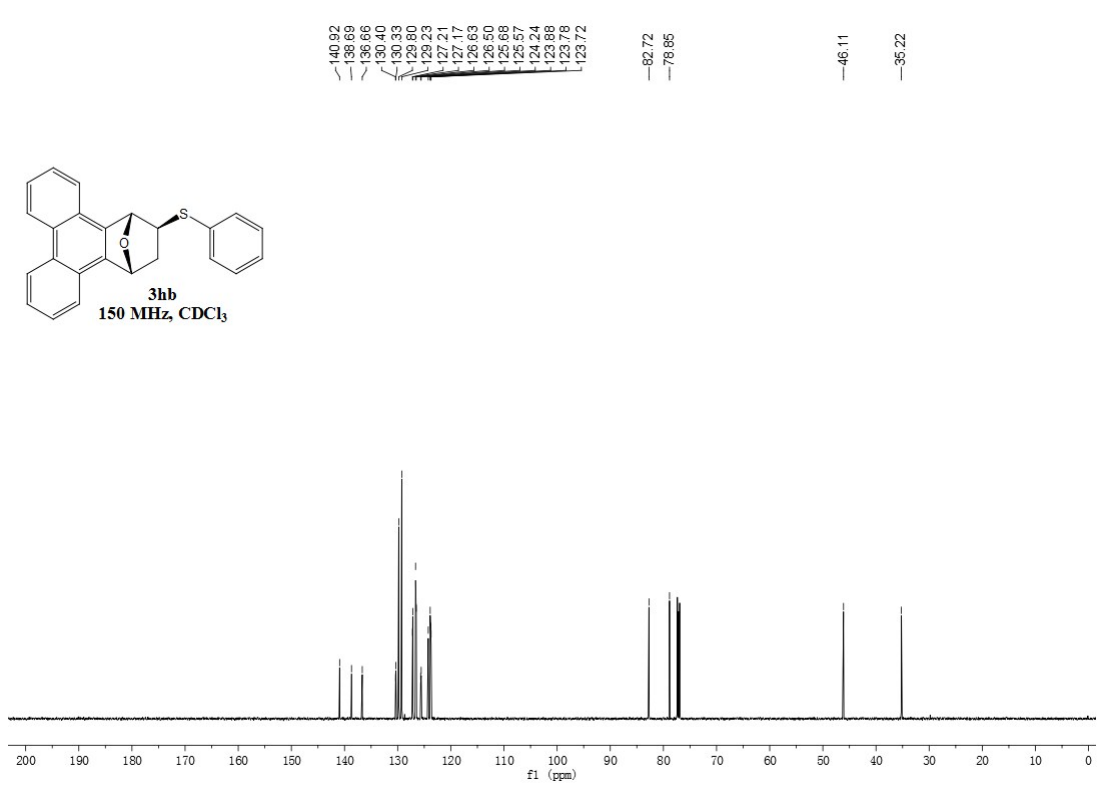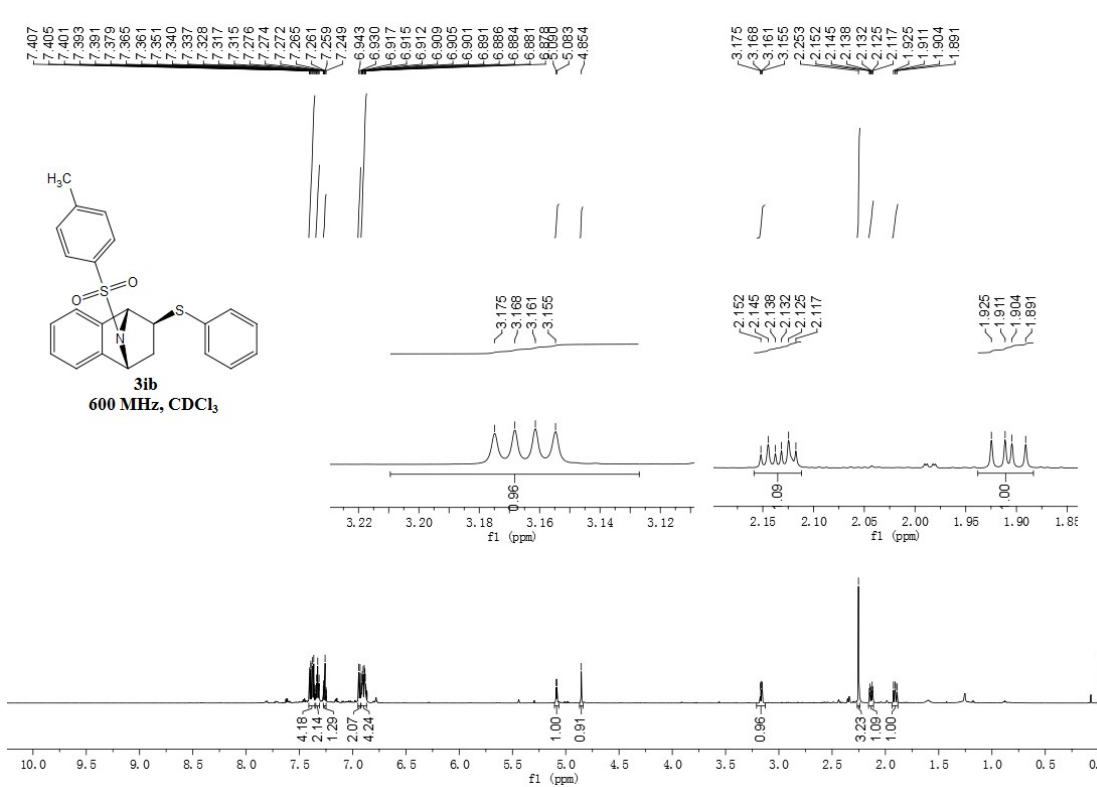

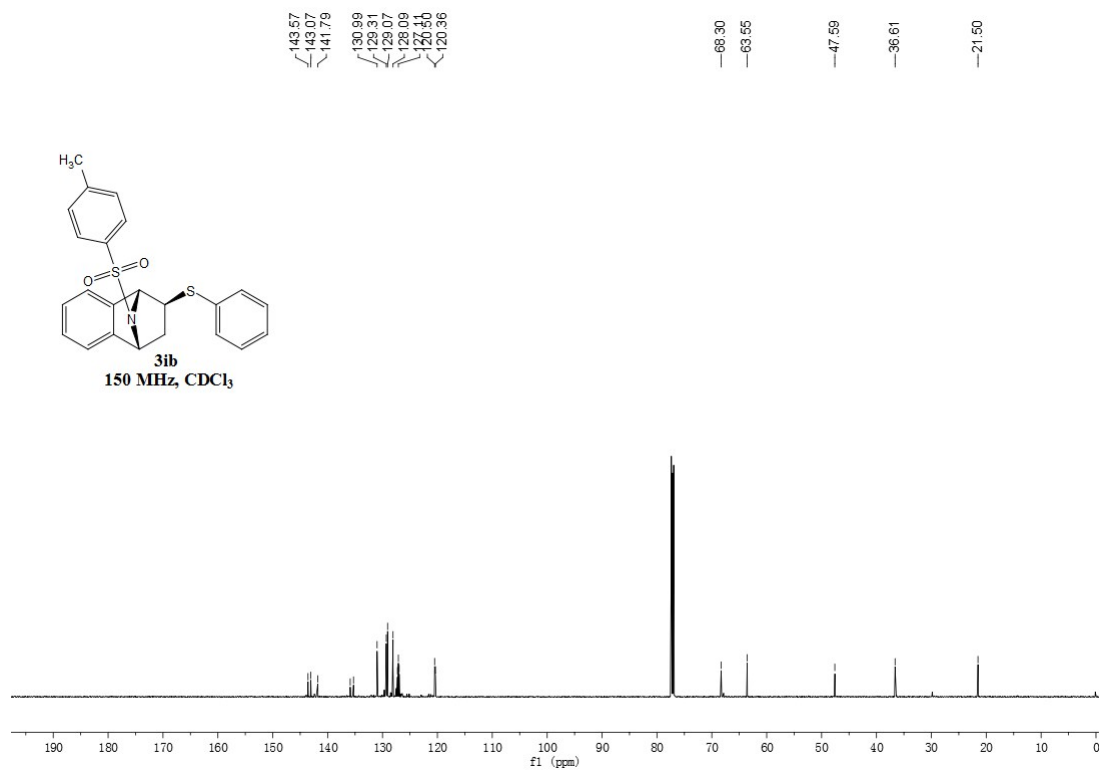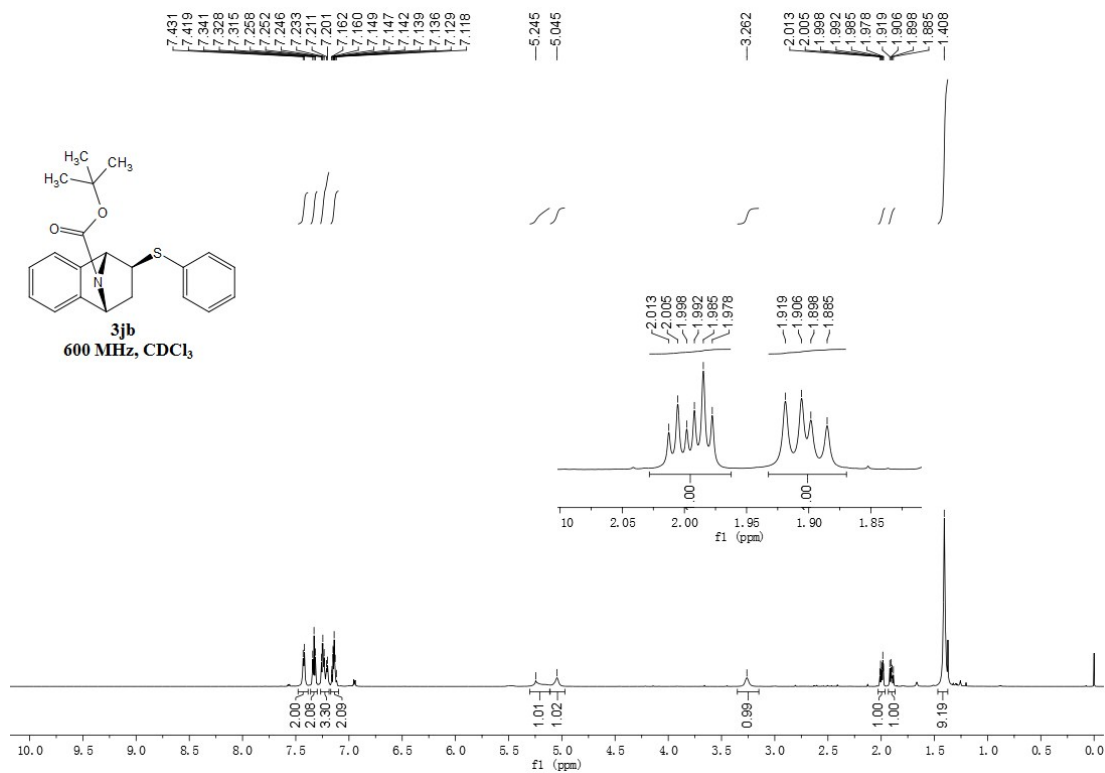

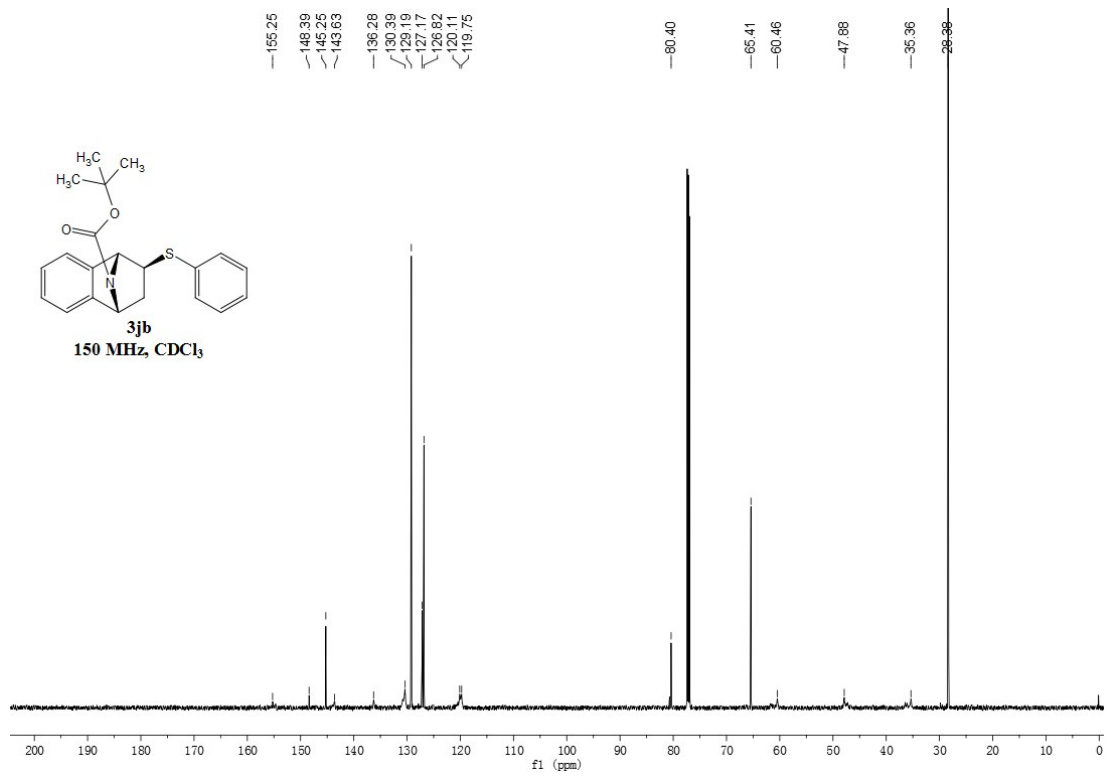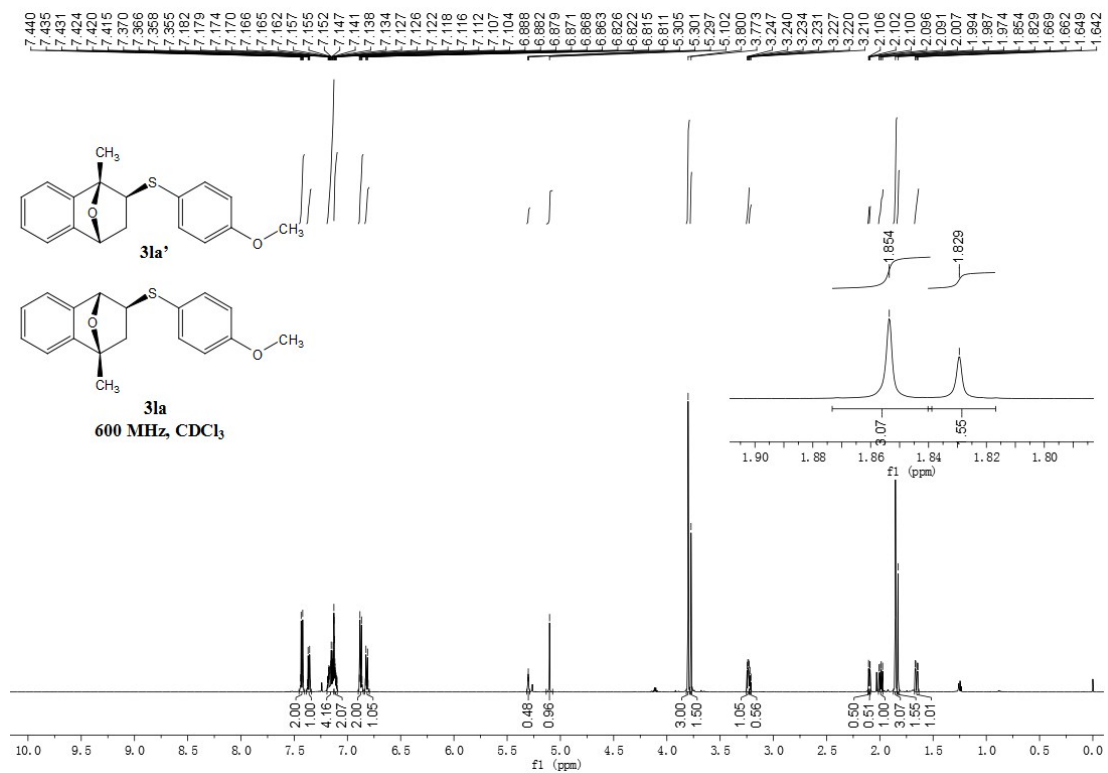



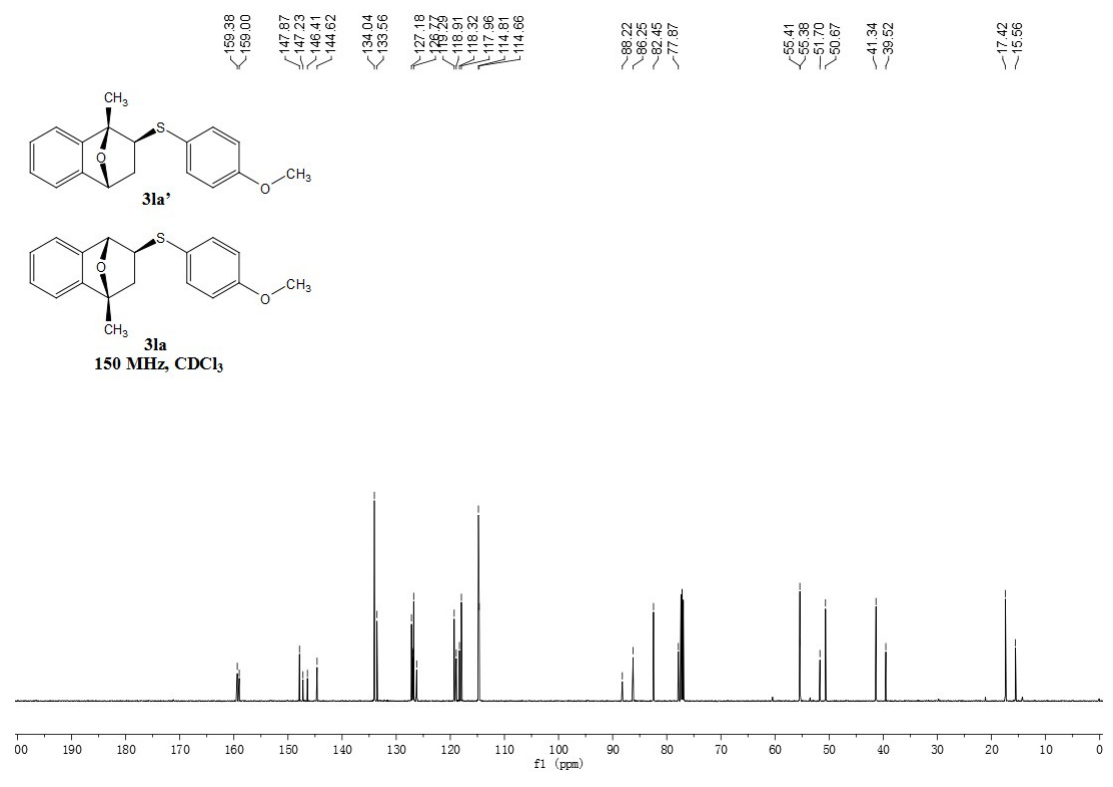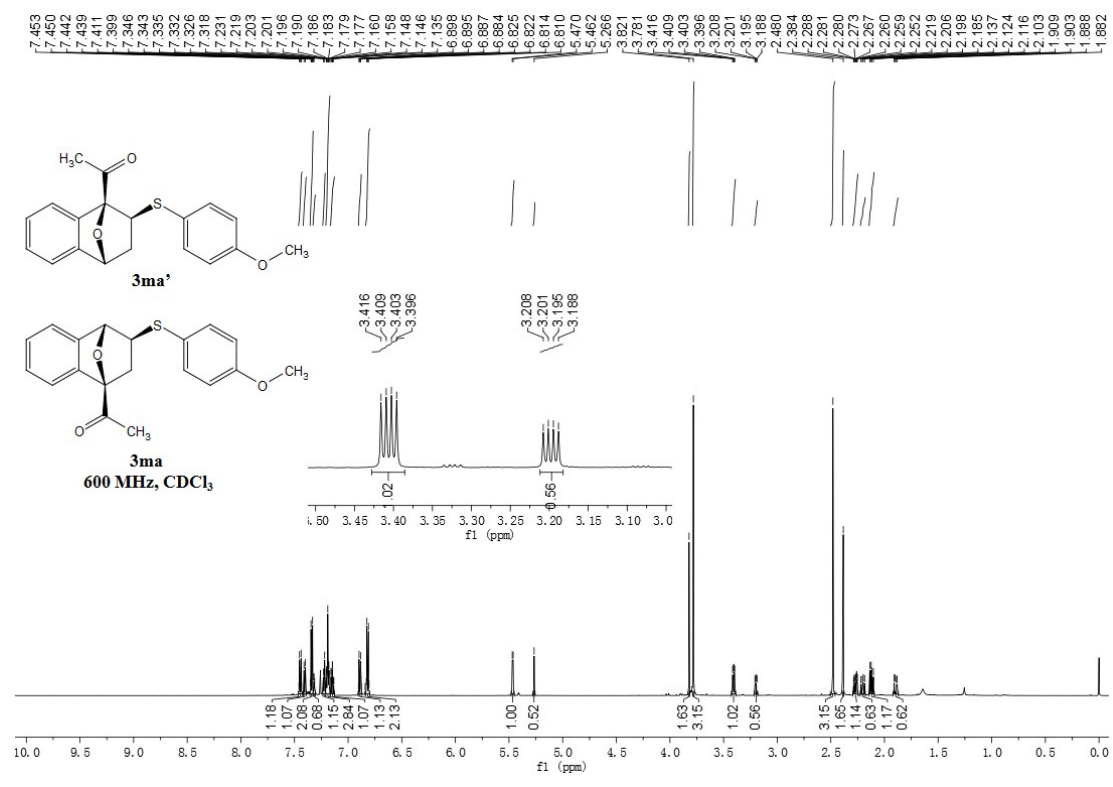

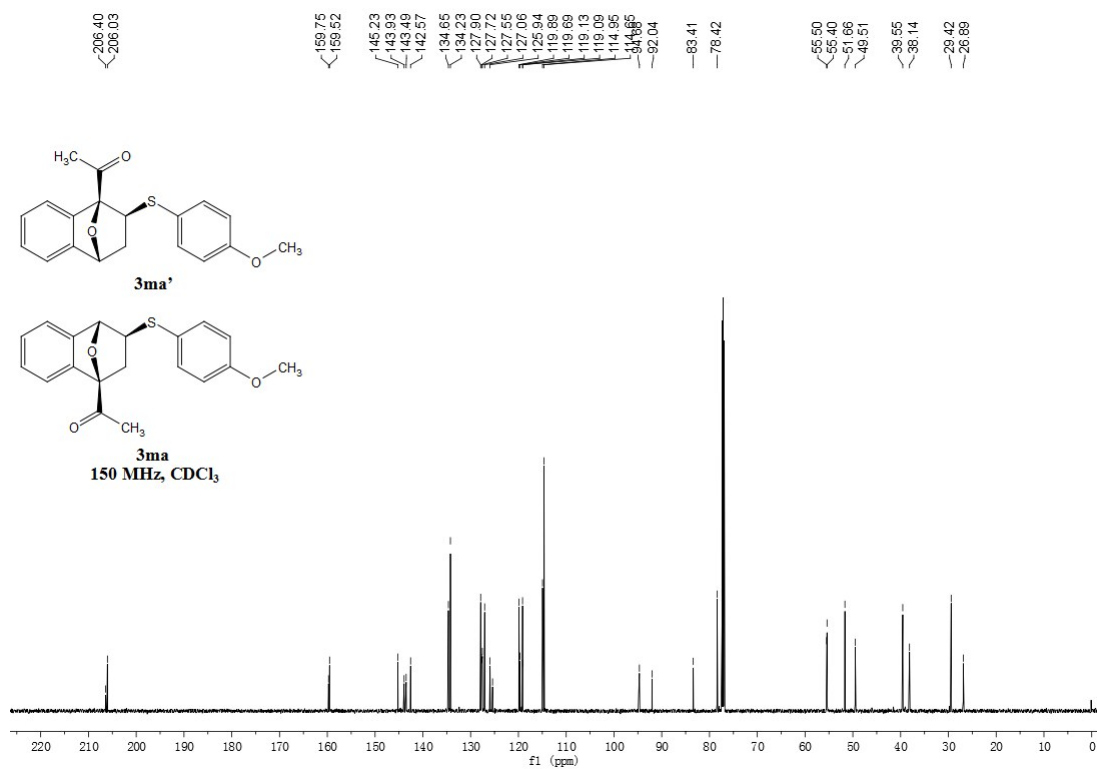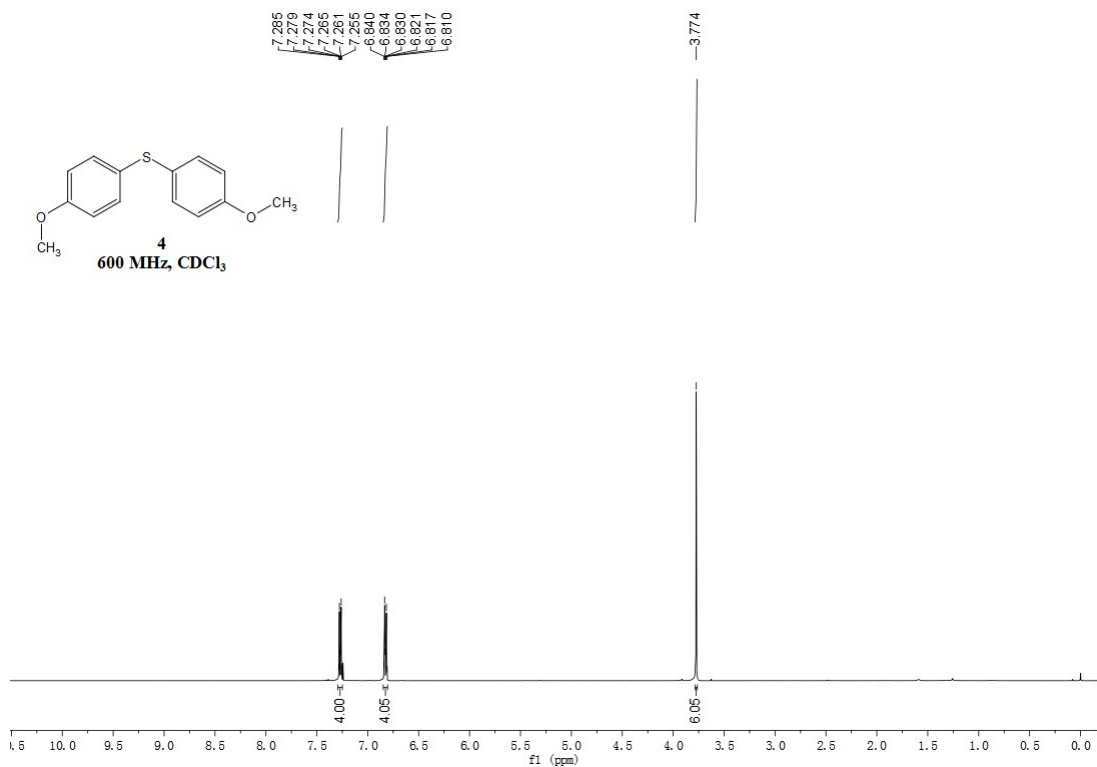

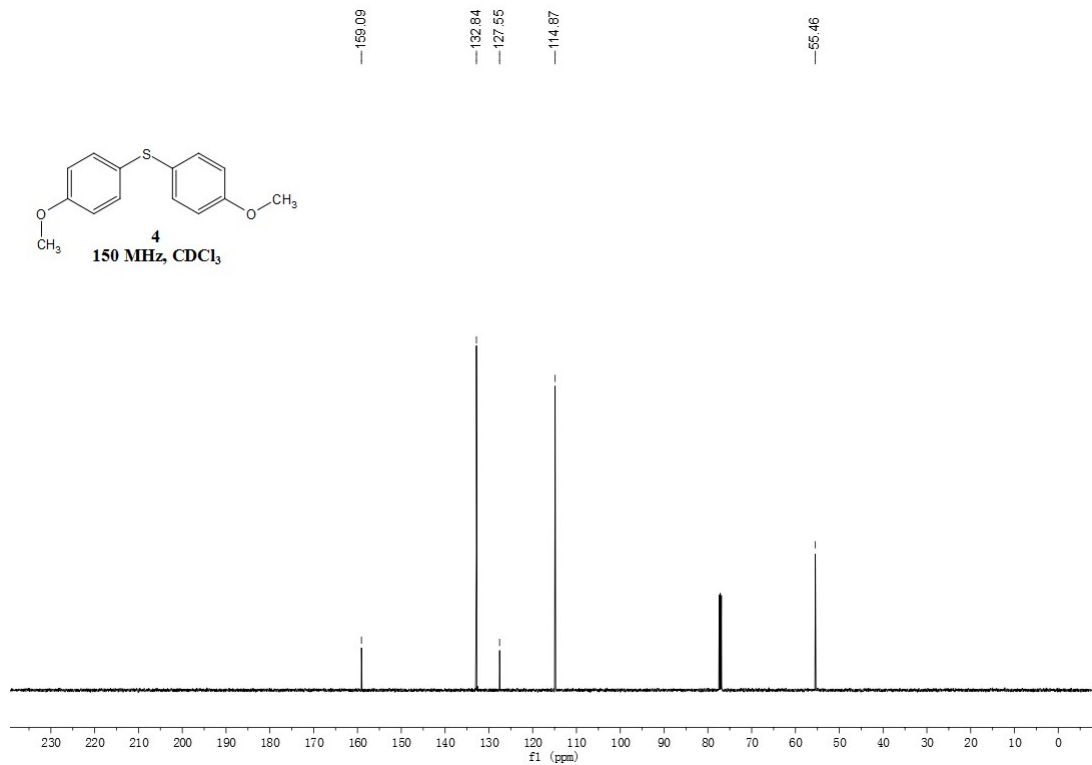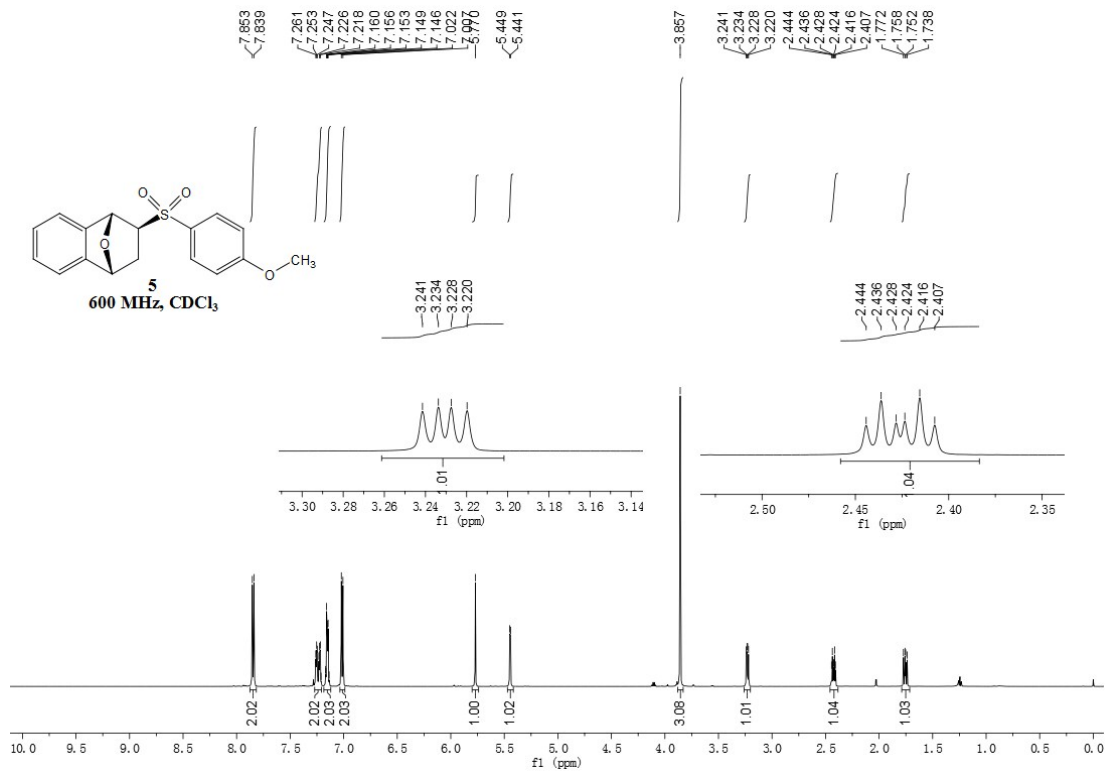

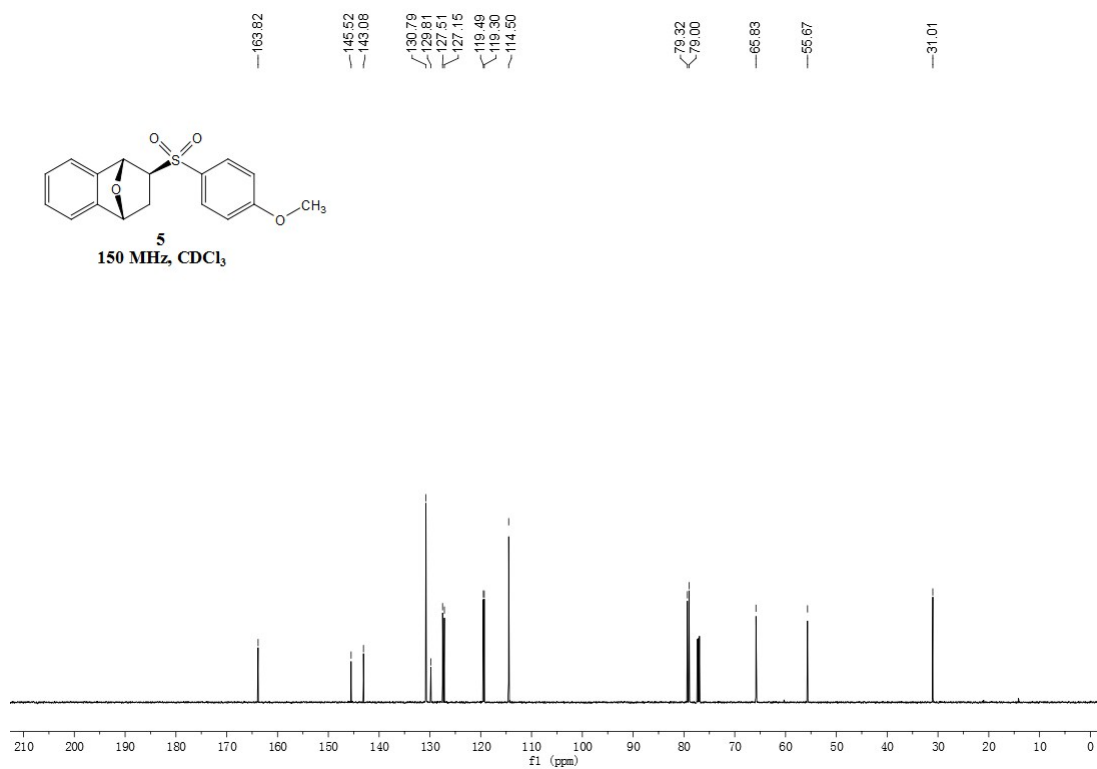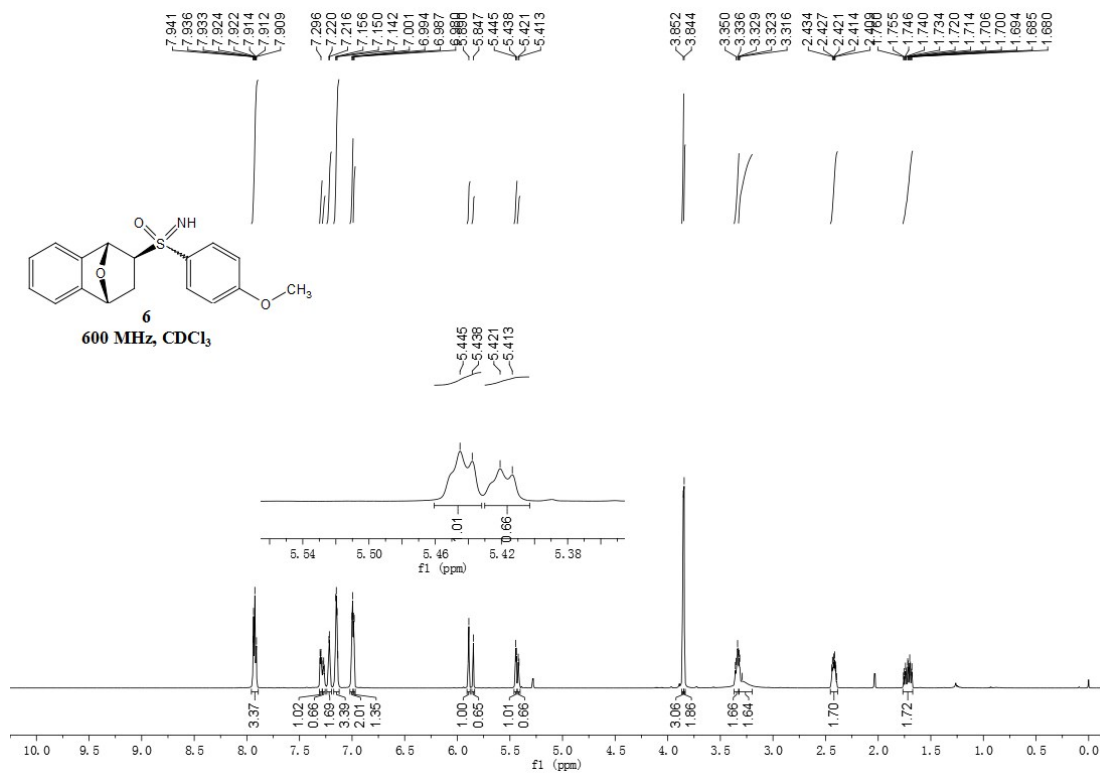

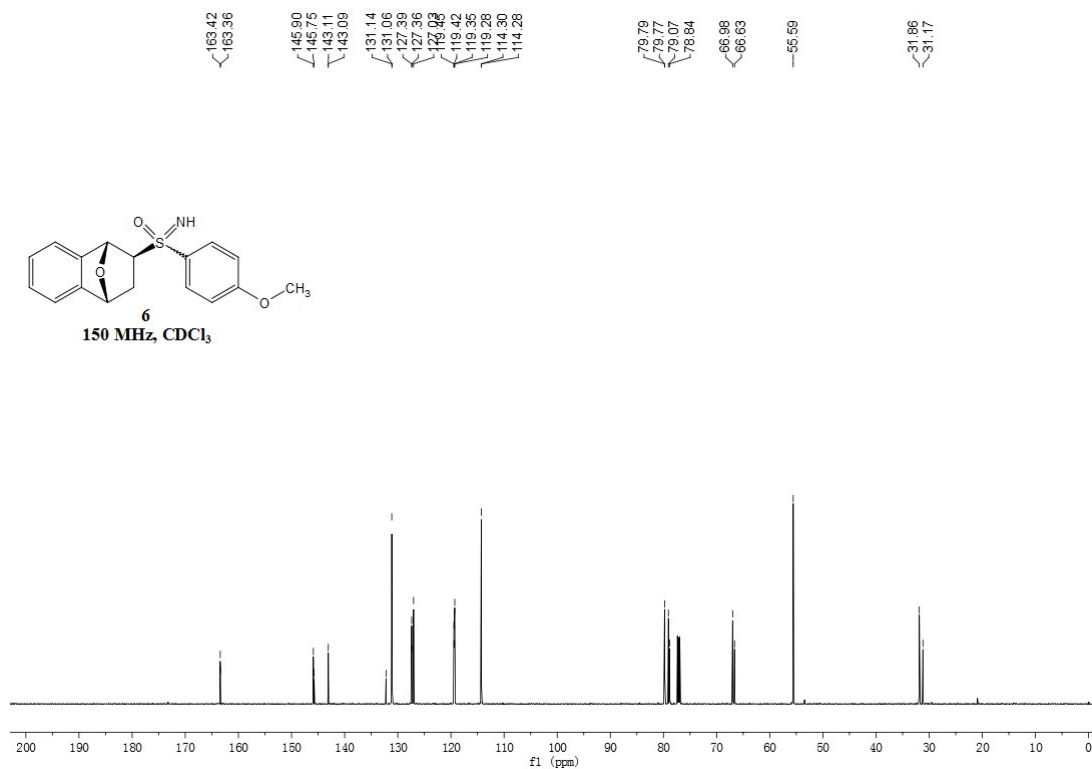

Supplement: d0ob00659a1.pdf [file d0ob00659a1.pdf]
